1 **A combination of two human neutralizing antibodies prevents SARS-CoV-2 infection in**  
2 **rhesus macaques**

3  
4 **Ronald R. Cobb<sup>1\*</sup>, Joseph Nkolola<sup>2\*</sup>, Pavlo Gilchuk<sup>3\*</sup>, Abishek Chandrashekar<sup>2</sup>, Robert V.**  
5 **House<sup>4</sup>, Christopher G. Earnhart<sup>5</sup>, Nicole M. Dorsey<sup>5</sup>, Svetlana A. Hopkins<sup>6</sup>, Doris M.**  
6 **Snow<sup>4</sup>, Rita E. Chen<sup>7,8</sup>, Laura A. VanBlargan<sup>7</sup>, Manuel Hechenblaikner<sup>1</sup>, Brian Hoppe<sup>1</sup>,**  
7 **Laura Collins<sup>1</sup>, Milan T. Tomic<sup>9</sup>, Genevieve H. Nonet<sup>9</sup>, Kyal Hackett<sup>4</sup>, James C.**  
8 **Slaughter<sup>10</sup>, Michael S. Diamond<sup>7,8,11</sup>, Robert H. Carnahan<sup>3,12</sup>, Dan H. Barouch<sup>2,†</sup>, and**  
9 **James E. Crowe, Jr.<sup>3,12,13†</sup>**

10

11 <sup>1</sup>Ology Bioservices, Process Development and Manufacturing, Alachua, FL, USA

12 <sup>2</sup>Center for Virology and Vaccine Research, Beth Israel Deaconess Medical Center, Harvard  
13 Medical School, Boston, MA, USA

14 <sup>3</sup>Vanderbilt Vaccine Center, Vanderbilt University Medical Center, Nashville, TN, USA

15 <sup>4</sup>Ology Bioservices, Frederick, MD, USA

16 <sup>5</sup>Joint Program Executive Office for Chemical, Biological, Radiological, and Nuclear  
17 Defense, US Department of Defense, Washington, DC, USA

18 <sup>6</sup>Logistics Management Institute (LMI), Tysons, VA, USA

19 <sup>7</sup>Department of Medicine, Washington University School of Medicine, St. Louis, MO, USA

20 <sup>8</sup>Department of Pathology & Immunology, Washington University School of Medicine, St.  
21 Louis, MO, USA

22 <sup>9</sup>Research and Development, Ology Bioservices, Inc., Alameda, CA, USA

23 <sup>10</sup>Department of Biostatistics, Vanderbilt University Medical Center, Nashville, TN, USA

24

25 <sup>11</sup>Department of Molecular Microbiology, Washington University School of Medicine, St.  
26 Louis, MO, USA

27 <sup>12</sup>Department of Pediatrics, Vanderbilt University Medical Center, Nashville, TN, USA

28 <sup>13</sup>Department of Pathology, Microbiology, and Immunology, Vanderbilt University Medical  
29 Center, Nashville, TN, USA

30

31

32

33 \* **These authors contributed equally**

34 † Correspondence: Dan Barouch, [dbarouch@bidmc.harvard.edu](mailto:dbarouch@bidmc.harvard.edu); James Crowe,

35 [james.crowe@vumc.org](mailto:james.crowe@vumc.org).

36 **Keywords:** SARS-CoV-2; aerosol; human monoclonal antibody; neutralizing antibodies; rhesus  
37 macaques; antibody therapeutics.

38 **ABSTRACT**

39

40 Human monoclonal antibody (mAb) treatments are promising for COVID-19 prevention, post-  
41 exposure prophylaxis, or therapy. However, the titer of neutralizing antibodies required for  
42 protection against SARS-CoV-2 infection remains poorly characterized. We previously  
43 described two potently neutralizing mAbs COV2-2130 and COV2-2381 targeting non-  
44 overlapping epitopes on the receptor-binding domain of SARS-CoV-2 spike protein. Here, we  
45 engineered the Fc-region of these mAbs with mutations to extend their persistence in humans  
46 and reduce interactions with Fc gamma receptors. Passive transfer of individual or combinations  
47 of the two antibodies (designated ADM03820) given prophylactically by intravenous or  
48 intramuscular route conferred virological protection in a non-human primate (NHP) model of  
49 SARS-CoV-2 infection, and ADM03820 potently neutralized SARS-CoV-2 variants of concern  
50 *in vitro*. We defined 6,000 as a protective serum neutralizing antibody titer in NHPs against  
51 infection for passively transferred human mAbs that acted by direct viral neutralization, which  
52 corresponded to a concentration of 20 µg/mL of circulating mAb.

53

## 54 INTRODUCTION

55 In the past decades, two pathogenic human coronaviruses, severe acute respiratory syndrome  
56 (SARS-CoV) and Middle East respiratory syndrome CoV (MERS-CoV), have been reported to  
57 cause severe respiratory tract disease associated with high morbidity and mortality. In December  
58 2019, the severe acute respiratory syndrome coronavirus 2 (SARS-CoV-2) emerged in Wuhan,  
59 Hubei province, China (Wang et al., 2020). SARS-CoV-2 is the causative agent of the current  
60 worldwide COVID-19 outbreak. The pandemic caused by COVID-19 has made the development  
61 of countermeasures an urgent global priority (Chan et al., 2020; Chen et al., 2020a; Li et al.,  
62 2020; Wu et al., 2020a; Zhou et al., 2020). Safe and effective vaccines and therapeutics are  
63 essential to combat this global pandemic.

64  
65 Initial work identified that SARS-CoV-2 uses the angiotensin-converting enzyme 2 (ACE2)  
66 protein from bats, civet cats, swine, non-human primates, or humans as an attachment and entry  
67 receptor (Letko et al., 2020; Wan et al., 2020; Zhou et al., 2020). As with related coronaviruses,  
68 interaction with ACE2 is mediated principally through the viral spike (S) protein. Hence, S on  
69 the surface of the virion is the main target for neutralizing antibodies on these coronaviruses.  
70 This homotrimeric glycoprotein is anchored in the viral membrane and consists of two subunits,  
71 S1, containing the N-terminal domain (NTD) and host cell receptor binding domain (RBD), and  
72 S2, which contains the fusion peptide (Walls et al., 2020; Wrapp et al., 2020). The S protein  
73 RBD directly interacts with the peptidase domain of ACE2 (Letko et al., 2020; Wan et al., 2020;  
74 Wrapp et al., 2020; Zhou et al., 2020). Recent studies of the S protein structure have shown that  
75 the protein exists in different conformations (Cai et al., 2020; Walls et al., 2020). Initially, the  
76 RBD switches from a closed conformation to an open conformation to allow hACE2 interaction.

77 Upon interaction with the hACE2 receptor and TMPRSS2 priming, S2 undergoes a dramatic  
78 conformational change to trigger host membrane fusion (Fan et al., 2020).

79

80 The RBD is the primary target of most potently neutralizing anti-SARS-CoV-2 antibodies  
81 identified to date (Cao et al., 2020; Ju et al., 2020; Pinto et al., 2020; Rogers et al., 2020; Shi et  
82 al., 2020; Wu et al., 2020b; Zost et al., 2020a). The RBD is also the main antigenic site for  
83 neutralizing antibody responses in current and experimental COVID-19 vaccines (Chen et al.,  
84 2020b; Mulligan et al., 2020; Zang et al., 2020). Previous studies established a non-human  
85 primate (NHP) model for SARS-COV-2 infection (Chandrashekar et al., 2020; Yu et al., 2020)  
86 demonstrating protection from viral infection by transfer of a high-dose of ACE2-blocking  
87 monoclonal antibodies (Zost et al., 2020a). Currently available antibody therapeutics that have  
88 received EUA from the FDA were approved for post-exposure treatment, not for pre-exposure  
89 prophylaxis (FDA, 2020, 2021a, b). Prophylaxis with passive antibody therapy could be  
90 important as an option for individuals at high risk of disease from SARS-CoV-2 infection who  
91 cannot be adequately vaccinated, including immunocompromised individuals or others who  
92 respond poorly to vaccination (AstraZeneca, 2021; Loo et al., 2021).

93

94 Here, we evaluated the prophylactic efficacy of low or moderate doses of two different human  
95 mAbs targeting non-overlapping neutralization epitopes in the RBD domain (Zost et al., 2020a;  
96 Zost et al., 2020b), which we assessed individually or in combination. It has been previously  
97 shown that antibody cocktails can limit the risk of viral mutations that escape antibody  
98 neutralization more efficiently than monotherapy (Baum et al., 2020b; Chen *et al.*, 2021b;  
99 Greaney et al., 2021). The antibody COV2-2381 binds directly to the receptor-binding motif on

100 the RBD on an S protomer in the open position. In contrast, the antibody COV2-2130 binds a  
101 non-overlapping site on the RBD that is accessible in either the open or closed S protomer  
102 conformation. We engineered the Fc portion of these antibodies to contain mutations that extend  
103 half-life (M252Y/S254T/T256E, designated YTE) (Richards et al., 1999; Uppal et al., 2015;  
104 Wang et al., 2015) and also to reduce Fc $\gamma$  receptor binding (L234A/L235A, designated LALA)  
105 (Lund et al., 1991; Wines et al., 2000; Xu et al., 2000). One conceptual advantage of this  
106 approach is that the use of these antibodies lacking Fc-mediated effects allowed us to assess the  
107 level of serum neutralizing activity needed *in vivo* to achieve efficacy in the absence of  
108 confounding variables. The resulting recombinant mAbs were designated mAb COV2-2130-  
109 YTE-LALA and mAb COV2-2381-YTE-LALA, and a two-mAb cocktail that is a 1:1 mixture of  
110 the two was designated ADM03820. The results demonstrate that ADM03820 protects against  
111 challenge with SARS-CoV-2 in the lungs and nasopharynx in a dose-dependent manner, and  
112 define titers of passively-transferred neutralizing antibodies that are necessary for protection in  
113 NHPs. In addition, our results support the use of antibody cocktail that could be administered by  
114 either intravenous or intramuscular route and that neutralizes SARS-CoV-2 variants of concern.  
115 This work provides evidence for developing a cocktail of antibodies as prophylaxis against  
116 SARS-CoV-2 in high-risk individuals.

117

## 118 **RESULTS**

119

120 **ADM03820 antibody cocktail is detected at primary sites of SARS-CoV-2 infection in NHPs**  
121 **when administered by IV or IM routes (Study 1).** In this study, we used a rhesus macaque  
122 SARS-CoV-2 challenge model for pre-clinical development studies of a prophylactic cocktail

123 ADM03820 comprising two engineered mAbs, COV2-2130-YTE-LALA and COV2-2381-YTE-  
124 LALA. We first assessed the human antibody concentration in serum and at primary sites of  
125 infection (*e.g.*, upper and lower respiratory tract mucosa) after 11.7 mg/kg intramuscular (IM) or  
126 31.3 mg/kg intravenous (IV) administration of ADM03820 in rhesus monkeys (**Figure 1A**).  
127 Circulating human mAbs were detected at high levels in serum on day 0 after administration  
128 (median 193 µg/mL after IM or 520 µg/mL after IV administration) and persisted in serum for  
129 >80 days, exhibiting a slow and gradual decline. The median human IgG serum concentration  
130 was 9 µg/mL on day 84 after IM or 26 µg/mL after IV administration (**Figure 1B**). Notably,  
131 ADM03820 antibodies also were detected in respiratory tract secretions, including  
132 bronchoalveolar lavage (BAL) and nasopharyngeal (NP) swabs up to 60 days after  
133 administration and at concentrations ranging from 10 ng/mL (the assay limit of detection) to 270  
134 ng/mL (**Figure 1C,D**). The concentration of human antibodies in these secretions *in vivo* prior to  
135 collection is expected to be higher, given that specimen collection from the mucosa sites with  
136 saline washes resulted in antibody dilution.

137

138 **ADM03820 antibody cocktail potently neutralizes variants of concern.** ADM03820 exhibited  
139 broad and potent neutralizing activity *in vitro* with half-maximal inhibitory concentration values  
140 <25 ng/mL, including potent neutralization of viruses representing wild-type SARS-CoV-2  
141 WA1/2020 with or without D614G mutation, authentic B.1.1.7 virus, authentic B.1.617.2 virus,  
142 and chimeric Wash-B.1.351 and Wash-B.1.1.28 viruses, which contain an S gene from B.1.351  
143 or B.1.1.28, respectively, in the backbone of WA1/2020 (Chen *et al.*, 2021a) (**Table 1**).  
144 Collectively, these results showed prolonged persistence of administered human antibodies in

145 serum and respiratory mucosa at concentrations sufficient for neutralization of currently  
146 circulating viral variants.

147

148 **Protective efficacy of ADM03820 in nonhuman primates (Study 2).** To evaluate the  
149 protective efficacy of ADM03820, animals received various doses of the ADM03820 by either  
150 IM or IV route followed by a viral challenge with  $10^5$  tissue culture infectious dose (TCID<sub>50</sub>) 3  
151 days later (**Figure 2A**). We then measured the circulating human antibody concentration in  
152 serum and serum neutralizing titers up to day 14 following IM or IV administration. While  
153 antibody concentration was below the limit of detection in the sham-treated group, animals in the  
154 antibody-treatment groups exhibited mAb levels proportional to the dose and route of  
155 administration of the combination product (**Figure 2B**). The antibody concentration in serum  
156 peaked approximately three days post-administration and remained constant throughout the  
157 remaining 14 days of the study.

158

159 We observed high circulating neutralizing antibody titers by pseudovirus neutralization assays in  
160 all ADM03820 treatment groups but not in the sham-treated control group. However, sham-  
161 treated control animals developed low-level neutralizing titers beginning around day 6,  
162 presumably due to the induction of natural host immunity (**Figure 2C**). In general, the overall  
163 neutralizing antibody titers were consistent with the pharmacokinetic data for the same treatment  
164 groups.

165

166 We assessed the kinetics of viral loads up to day 14 following viral challenge in BAL and NP  
167 swab samples by determining the levels of SARS-CoV-2 sub-genomic RNA (sgRNA), which



168 distinguishes replicating virus from input challenge virus, using reverse-transcriptase-polymerase  
169 chain reaction (RT-PCR) (Chandrashekar et al., 2020; Wolfel et al., 2020; Yu et al., 2020). High  
170 levels of sgRNA were observed in the sham controls (**Figure 2D-E**) with a median peak of 5.0  
171 (range = 3.3 to 5.4) log<sub>10</sub> sgRNA copies/mL in BAL fluid and 6.9 (range = 4.9 to 7.3) log<sub>10</sub>  
172 copies per swab of sgRNA in NP. As expected, peak viral loads occurred between days 1 to 4  
173 after challenge. All treatment groups showed nearly full protection from viral replication in the  
174 BAL fluid, although individual animals displayed low-level, transient viral replication on day 1,  
175 which was eliminated by day 2 (**Figure 2D**). Although somewhat higher sgRNA levels were  
176 observed in some animals in the NP swabs on day 1, similar to BAL fluid, most treated animals  
177 quickly eliminated detectable virus by day 2 (**Figure 2E**), with the exception of one animal in  
178 the group receiving the lowest dose (3.9 mg/kg IM) and one animal in the group receiving 11.7  
179 mg/kg dose.

180

181 **Protective efficacy of individual mAbs of the cocktail in nonhuman primates (Study 3).** The  
182 next challenge study was conducted after prophylactic administration of the individual 2130-  
183 YTE-LALA or 2381-YTE-LALA antibodies and was followed by quantitative serum antibody  
184 levels and virologic protection measurements as in the challenge study above (**Figure 3A**). As  
185 expected, the concentration of circulating human antibodies was below the level of detection in  
186 the sham-treated group. In contrast, animals that received either mAb demonstrated  
187 concentrations in serum proportional to the administered dose (**Figure 3B**). Peak antibody  
188 concentration was observed within three days of administration and remained constant  
189 throughout the study. Serum neutralizing titers of administered individual mAbs showed similar  
190 peak and kinetics to those seen with the ADM03820 cocktail (**Figure 3C**). Sham-treated animals

191 showed low levels of neutralizing antibody activity by day six due to the host immune response  
192 to SARS-CoV-2 infection (**Figure 3C**).

193  
194 As evidenced by sgRNA levels, viral infection again was observed in all the sham-treated control  
195 animals in both BAL fluid and NP samples (**Figure 3D,E**). For both treatment mAbs, most  
196 animals quickly cleared virus by day two post-challenge after transient viral replication  
197 regardless of dose or route of administration, except for one animal in the 1.95 mg/mL 2381-  
198 YTE/LALA IM group (**Figure 3D**).

199  
200 Similar levels of viral protection were observed in NP samples with the 15.65 mg/mL dose of  
201 either individual antibody (**Figure 3E**) as was observed with similarly high tested doses of the  
202 ADM03820 cocktail (**Figure 2E**). However, higher median viral loads were observed in the NP  
203 samples for both antibody treatments at the low dose of 1.95 mg/mL. This dose is two-fold lower  
204 than the lowest dose tested for the cocktail and likely represents viral breakthrough due to  
205 insufficient neutralizing antibody levels.

206  
207 **Protective efficacy of ADM03820 that administered by IM route at low doses (Study 4).** To  
208 determine the minimally protective dose of the ADM03820 cocktail, animals were treated with  
209 two-fold decreasing doses of the antibody cocktail across four treatment groups from 3.91 mg/kg  
210 to 0.49 mg/kg by the IM route (**Figure 4A**). Circulating human antibody titers were not present  
211 in sham-treated animals and were consistent with the administered dose in the treatment groups  
212 (**Figure 4B**). The serum neutralizing antibody titer decrease was proportional to the administered  
213 ADM03820 dose and was observed across all four treatment groups but not observed in sham

214 group animals (**Figure 4C**). BAL fluid viral load measurement suggested protection in the lower  
215 airways at all tested antibody doses, including at the 0.49 mg/kg dose (**Figure 4D**). However,  
216 increases in NP swab viral loads were seen across decreasing dose conditions, with no protection  
217 observed in the 0.98 mg/mL or 0.49 mg/mL groups (**Figure 4E**). These results suggested that a  
218 higher antibody dose would be necessary to control viral replication in the upper airways  
219 following IM administration.

220

221 **Defining protective serum antibody concentration and neutralizing antibody titer in NHP**  
222 **SARS-CoV-2 challenge model.** We next estimated a protective threshold for prophylaxis with  
223 potent YTE-LALA Fc-region engineered human Abs that acted principally via direct virus  
224 neutralization *in vivo*. We performed an overall analysis using data from challenge studies 2, 3  
225 and 4 above by comparing human mAb concentration in serum or half-maximal neutralizing titer  
226 values at the time of challenge to the time-weighted average values for the change of sgRNA  
227 viral load in BAL fluid or NP swabs from day 1 to day 10 after viral challenge (see *Methods* and  
228 **Table S1-2**). A threshold for virological protection in BAL fluid and NP was estimated to be  
229 equal or higher than 20 µg/mL for circulating human antibody concentration and equal to or  
230 higher than 6,000 for serum neutralizing antibody titer (NT<sub>50</sub>) (**Figure 5A-D**). Antibody levels  
231 above these thresholds conferred full protection in 83% to 93% of challenged NHP, which  
232 contrasted with 17% to 50% fully protected animals with antibody levels below these estimated  
233 protective thresholds (**Figure 5E**). Overall, our results suggested that high prophylaxis efficacy  
234 can be achieved with the cocktail of two YTE-LALA Fc-region engineered human Abs  
235 formulated as a cocktail ADM03820 and demonstrated the potential for IM delivery of human  
236 antibody-based therapeutics for COVID-19.

237

238 **DISCUSSION**

239 These studies provide insights into both quantitative and qualitative aspects of the use of human  
240 mAbs as medical countermeasures for COVID-19. First, we demonstrate the principle that  
241 prophylaxis against infection in NHPs can be achieved using neutralizing antibodies engineered  
242 to lack Fc-mediated functions. These data extend previous findings that demonstrated  
243 prophylaxis efficacy for neutralizing mAbs with intact Fc-mediated functions in NHPs (Baum et  
244 al., 2020a; Jones et al., 2021; Zost et al., 2020a; Winkler et al., 2021). Second, the data show  
245 excellent protection by antibodies acting only by direct neutralization of virus and define the  
246 protective level of serum neutralizing activity in the absence of confounding variables of Fc-  
247 mediated effects. A threshold for virological protection in BAL fluid and NP secretions was  
248 estimated to be equal to or higher than 6,000 for serum neutralizing antibody titer (NT<sub>50</sub>), since  
249 antibody levels above these thresholds conferred full protection in 83% to 93% of challenged  
250 NHPs. This quantitative determination of a neutralizing titer as a direct mechanistic correlate of  
251 protection has implications for estimating the durability of protection conferred by passive  
252 immunization with antibodies (Loo et al., 2021) or active immunization with vaccines. The  
253 failure to achieve serum neutralizing titers above this threshold likely explains the lack of limited  
254 efficacy observed in most clinical trials of COVID-19 convalescent plasma (Begin et al., 2021;  
255 Bradfute et al., 2020; Janiaud et al., 2021). Also, this quantitative threshold for correlate of  
256 protection sheds light on the somewhat limited magnitude and durability of the humoral  
257 immunity component of protection following natural infection or immunization. Third, the  
258 studies also support a public health strategy of prophylaxis of high-risk individuals who cannot  
259 be adequately vaccinated by using administration of neutralizing mAbs instead. Engineering of

260 the Fc region with YTE mutations to accomplish long-half extends the prophylactic efficacy of  
261 the antibodies, predicted to last for at least several months. Fourth, we also assessed IM and IV  
262 administration and found that IM administration was effective, which could allow a much easier  
263 and more practical approach to administration of these antibodies at large scale in populations at  
264 risk.

265

266 Numerous groups have reported the isolation of potently neutralizing antibodies from survivors  
267 that target the RBD of SARS-CoV-2 S protein (Brouwer et al., 2020; Cao et al., 2020; Robbiani  
268 et al., 2020; Rogers et al., 2020; Shi et al., 2020; Wec et al., 2020; Wu et al., 2020b). The studies  
269 here support the further development of a two-mAb prophylactic anti-SARS-CoV-2 cocktail  
270 (ADM03820) incorporating mAbs that target non-overlapping regions of the RBD (Zost et al.,  
271 2020a; Zost et al., 2020b). The combination of engineered antibodies possesses desirable  
272 features consistent with the objectives above, including long half-life, an effective IM  
273 formulation, accumulation at respiratory mucosa following systemic administration, and a clear  
274 mechanism of action purely through direct virus neutralization. The combination was shown  
275 effective in a stringent rhesus macaque model for SARS-CoV-2 we previously developed with  
276 high viral loads in the upper and lower respiratory tract, cellular and humoral immune responses,  
277 and pathogenic evidence of viral pneumonia (Chandrashekar et al., 2020; Yu et al., 2020). In the  
278 present study, we demonstrated that prophylactic administration of the two-mAb cocktail  
279 ADM03820 for protection against SARS-CoV-2 infection in this animal model, reducing viral  
280 loads in the upper and lower airways and accelerating virus clearance.

281

282 These antibodies include the YTE mutations in Fc region, which increase the serum half-life of  
283 the mAbs (Dall'Acqua et al., 2006; Dall'Acqua et al., 2002; Yu et al., 2017) and the LALA Fc  
284 mutations that were designed to decrease the Fc effector function by reducing interaction with  
285 Fc $\gamma$  receptors (Lund et al., 1991; Wines et al., 2000; Woodle et al., 1998; Yu et al., 2017) .  
286 Studies in murine SARS-CoV-2 challenge models have demonstrated equivalently high  
287 prophylactic efficacy by potently neutralizing RBD-specific mAb variants with intact or  
288 abrogated Fc region-mediated effector functions (Winkler et al., 2021). Previous studies in a  
289 similar NHP model have shown that COV2-2381 IgG with a conventional Fc region cleared the  
290 virus infection, and no virus was observed when given at 50 mg/kg (Zost et al., 2020a). Here, the  
291 addition of YTE and LALA mutations did not appear to reduce the ability of these mAbs to clear  
292 SARS-CoV-2 infection in either the BAL fluid or NP swabs in rhesus macaques when  
293 administered three days prior to challenge.

294  
295 A lower serum antibody neutralizing titer (>100) was associated with protection by vaccines in  
296 NHP SARS-CoV-2 challenge models (Corbett et al., 2020; McMahan et al., 2021; Yu et al.,  
297 2020) and in human clinical trials (Anderson et al., 2020; Jackson et al., 2020; Khoury et al.,  
298 2021) relative to the protective titer associated with mAbs (~6,000) that we defined here.  
299 However, a similar protective titer against SARS-CoV-2 was identified in NHPs for a  
300 combination of another combination of two neutralizing human mAbs in clinical development -  
301 AZD7442 (Loo et al., 2021). Future studies are needed to determine if the lower serum  
302 neutralizing antibody protective titer for COVID-19 vaccines relative to that achieved by passive  
303 mAb transfer is due to targeting of multiple epitopes on the SARS-CoV-2 S, different anatomical  
304 distribution of antibody responses, a contribution of Fc-mediated effector functions in the

305 polyclonal response, or complementary mechanisms of protection that are mediated by vaccine-  
306 induced T cells.

307

308 The RBD sequence is highly variable in SARS-CoV-2, which may represent a selective  
309 adaptation (Demogines et al., 2012; Frank et al., 2020; MacLean et al., 2020; Starr et al., 2020).

310 Our approach, to use a combination of two antibodies that do not compete for the same epitope,  
311 could prevent the selection of escape mutant viruses that are likely inherent in monotherapy  
312 approaches. Recent work in the context of SARS-CoV-2 has demonstrated that combinations of  
313 two antibodies that do not compete for binding to the same region of the spike protein offer  
314 higher resistance to escape mutations while protecting animals from SARS-CoV-2 challenge  
315 (Baum et al., 2020a; Baum et al., 2020b; Weinreich et al., 2020; Zost et al., 2020a; Chen et al.,  
316 2021b).

317

318 In prior NHP studies, mAbs typically were infused via IV administration. The studies presented  
319 here demonstrate the efficacy of these antibodies either administered as a combination or alone  
320 when administered by the IM route This approach could provide a more broadly deployable  
321 route of administration for these antibodies to patients in clinical settings. In addition, the doses  
322 that were efficacious in these studies translate to very low doses in humans compared to  
323 conventional antibody therapies. The data generated in these studies provides strong evidence for  
324 the continued development of these antibodies for clinical use.

325

326 **Acknowledgements:**

327 This research was supported by a contract from the Joint Program Executive Office for  
328 Chemical, Biological, Radiological and Nuclear Defense (JPEO-CBRND) contract number  
329 W911QY-20-9-003; 20-05, the Joint Sciences and Technology Office and the Joint Program  
330 Executive Office, contract number MCDC-16-01-002 JSTO, JPEO and by DARPA grant  
331 HR0011-18-2-0001, and NIH grant R01 AI157155. J.E.C. is a recipient of the 2019 Future  
332 Insight Prize from Merck KGaA. The content is solely the responsibility of the authors and does  
333 not represent the official views of the U.S. government or other sponsors.

334

335 **Declaration of interests:**

336 R.R.C., R.V.H., D.M.S., M.H., B.H., L.C., G.N., M.T.T and K.H. are employees of Ology  
337 Bioservices. C.G.G. and N.M.D. are employees of the Joint Program Executive Office for  
338 Chemical, Biological, Radiological and Nuclear Defense for the United States Department of  
339 Defense (JPEO-CBRND). S.A.H. is an employee of Logistics Management Institute (LMI),  
340 performing technical contract support for JPEO-CBRND. J.E.C. has served as a consultant for  
341 Luna Biologics, is a member of the Scientific Advisory Board of Meissa Vaccines and is  
342 Founder of IDBiologics. The Crowe laboratory at Vanderbilt University Medical Center has  
343 received sponsored research agreements from Takeda, IDBiologics and AstraZeneca. Vanderbilt  
344 University has applied for patents related to antibodies studied in this paper. M.S.D. is a  
345 consultant for Inbios, Vir Biotechnology, Fortress Biotech and Carnival Corporation, and on the  
346 Scientific Advisory Boards of Moderna and Immunome. The laboratory of M.S.D. has received  
347 funding support in sponsored research agreements from Moderna, Vir Biotechnology, Kaleido,  
348 and Emergent BioSolutions.





350 **MATERIALS AND METHODS**

351

352 *Monoclonal antibodies*

353 The antibody COV2-2381 and COV2-2130 sequences have been previously described (Zost et  
354 al., 2020a; Zost et al., 2020b). The antibodies were produced and purified as previously  
355 described (Tomic et al., 2019). Briefly, stably transfected CHO cells expressing either COV2-  
356 2130-YTE-LALA or COV2-2381-YTE-LALA were generated using Leap-In transposon vectors  
357 (ATUM) containing the respective antibody heavy and light chain genes and a glutamine  
358 synthetase gene as a selectable marker. Leap-In vectors were transfected into a CHO-K1 GS  
359 knockout cell line (HD-BIOP3; from Horizon Discovery) and stably transfected pools were  
360 selected using medium lacking L-glutamine. Manufacturing was performed under Good  
361 Manufacturing Practices using stably transfected pools in large scale bioreactors and antibody  
362 material was purified from harvested supernatants. The downstream processes consisted of 3  
363 chromatography steps: 3) viral inactivation, 2) filtered viral reduction (Planova), and 3) an  
364 ultrafiltration step to concentrate the product to the appropriate g/L. Both individual antibodies  
365 and the combination were generated as cGMP-grade drug substance and drug product materials,  
366 were provided at a concentration of 52 mg/mL and were stored at -80°C until day of  
367 administration. On the day of administration, the stock vials were thawed at room temperature  
368 (RT) and gently inverted 6 to 10 times to mix the contents. After thawing, the vials were stored  
369 at RT until use. Based on individual animal weights and dose required, the purified antibody  
370 stock for each NHP was diluted to 1 mL in 0.9% normal saline diluent (Baxter) for IM injections  
371 and 10 mL in the same diluent for IV infusions. IM injections were delivered bilaterally in the

372 upper quadriceps at 0.5 mL/quadriceps. IV infusions were performed at a rate of 1 to 2 mL/min  
373 over 5 to 10 min/animal for a total of 10 mL infused per animal.

374  
375

### 376 *Animal studies*

377 All animals were maintained at Bioqual, Inc. (Rockville, MD) which is fully accredited by the  
378 Association for Assessment and Accreditation of Laboratory Animal Care International  
379 (AAALAC) and approved by the Office of Laboratory Animal Welfare (NIH/PHS assurance  
380 number D16-00052). Studies were conducted in compliance with all relevant local, state, and  
381 federal regulations and were approved by the Bioqual Institutional Animal Care and Use  
382 Committee (IACUC). Cynomolgus monkeys (*Macaca fascicularis*) (2.2 – 5.8 kg body weight; 6  
383 to 12 years old) were mixed male and female and randomly assigned to groups. In Study 1  
384 (n=3/group), experimental animals received the ADM03820 cocktail of COV2-2130-YTE-  
385 LALA and COV2-2381-YTE-LALA at either 11.7 mg/kg IM or 31.3 mg/kg IV and were  
386 followed for 12 weeks for antibody pharmacokinetics only without any SARS-CoV-2 challenge.  
387 In Study 2 (n=4/group), sham control animals received no mAb while 12 experimental animals  
388 were administered the ADM03820 cocktail at varying doses and administration routes three days  
389 before challenge as described in **Figure 2**. Animals then were challenged with  $10^5$  TCID<sub>50</sub>  
390 SARS-CoV-2 USA-WA1/2020. These doses were administered as 0.5 mL per nare intranasally  
391 and 1 mL intratracheally on day 0. In Study 3, four sham-treated controls received no mAb while  
392 12 experimental animals (n=3/group) were administered three days prior to challenge with either  
393 COV2-2130-YTE-LALA or COV2-2381-YTE-LALA separately at varying doses and  
394 administration routes as described in **Figure 3A**. Animals were then challenged with  $10^5$  TCID<sub>50</sub>  
395 SARS-CoV-2 similarly as in the first study. In Study 4 (n=3/group), sham control animals

396 received no mAb while experimental animals were administered the ADM03820 cocktail IM at  
397 varying low doses three days before challenges performed similarly to studies 2 and 3 (**Figure**  
398 **2,3**). Macaques in all four studies were monitored daily with an internal scoring protocol  
399 approved by the IACUC. These studies were not blinded.

400

#### 401 *Viruses*

402 The SARS-CoV-2 USA-WA1/2020 strain was obtained from BEI Resource (NR-52281; Lot  
403 #7003175). The viral stocks were expanded using Vero E6 cells and harvested on day 5  
404 following inoculation. To confirm the viral identity, complete genome sequencing was  
405 performed and was shown to be 100% identical to the parent virus sequence. The D614G virus  
406 was produced by introducing the mutation into an infectious clone of WA1/2020, and the  
407 B.1.351 and B.1.1.28 spike genes were cloned into the WA1/2020 infectious clone to produce  
408 Wash-B.1.351 and Wash-B.1.1.28 chimeric viruses, as described previously (Chen et al., 2021a).  
409 B.1.1.7 and B.1.617.2 were isolated from infected individuals. D614G, Wash-B.1.351, Wash-  
410 B.1.1.28, B.1.1.7, and B.1.617.2 viruses were propagated on Vero-TMPRSS2 cells and subjected  
411 to deep sequencing.

412

#### 413 *Quantification of circulating human mAbs and serum neutralization activity*

414 The quantification of infused/injected human SARS-CoV-2 mAbs in NHP serum at multiple  
415 time points was performed as previously described [20]. Additionally, the serum neutralization  
416 activities of infused or injected mAbs were also monitored at the same time points using a  
417 pseudovirus neutralization assay as previously described [24, 25].

418

419 ***BAL and NP swab collection***

420 Collection of mucosal secretions was performed on sedated NHPs using cotton swabs (COPAN  
421 flocculated swab) or nasosorption FX-I devices (Hunt Developments Ltd.). The swabs were inserted  
422 into the nasal cavity and rotated gently. Following collection, the swabs were placed into a  
423 collection vial containing 1 mL of phosphate buffered saline (PBS). All vials were stored at  $\leq -$   
424  $70^{\circ}\text{C}$  until viral load testing (or antibody quantification if required).

425

426 The bronchoalveolar lavage (BAL) collection procedure was performed on anesthetized animals  
427 by the “chair method”. In brief, each animal was placed in dorsal recumbency in a chair channel  
428 and a red rubber feeding tube inserted into the trachea via a laryngoscope during inspiration. A  
429 total of 10 mL PBS was flushed through the tube and the volume instilled and recovered from  
430 each animal recorded. The collected BAL samples were placed immediately onto wet ice and  
431 processed for isolation of fluid by centrifugation at  $4^{\circ}\text{C}$  followed by supernatant removal. BAL  
432 aliquots were stored at  $\leq -70^{\circ}\text{C}$  until viral load testing (or antibody quantification if required).

433 ***Focus reduction neutralization test***

434 Serial dilutions of mAbs were incubated with  $10^2$  FFU of different strains or variants of SARS-  
435 CoV-2 for 1 h at  $37^{\circ}\text{C}$ . Antibody–virus complexes were added to Vero-TMPRSS2 cell  
436 monolayers in 96-well plates and incubated at  $37^{\circ}\text{C}$  for 1 h. Subsequently, cells were overlaid  
437 with 1% (w/v) methylcellulose in MEM. Plates were collected 30 h later by removing overlays  
438 and fixed with 4% PFA in PBS for 20 min at room temperature. Plates were washed and  
439 sequentially incubated with an oligoclonal pool of SARS2-2, SARS2-11, SARS2-16, SARS2-31,  
440 SARS2-38, SARS2-57 and SARS2-71 anti-S (VanBlargan et al., 2021) antibodies and HRP-  
441 conjugated goat anti-mouse IgG (Sigma, 12-349) in PBS supplemented with 0.1% saponin and

442 0.1% bovine serum albumin. SARS-CoV-2-infected cell foci were visualized using TrueBlue  
443 peroxidase substrate (KPL) and quantitated on an ImmunoSpot microanalyzer (Cellular  
444 Technologies).

445

#### 446 *Subgenomic mRNA assay*

447 The subgenomic mRNA of SARS-CoV-2 was assessed by RT-PCR as previously described  
448 (Chandrashekar et al., 2020; Wolfel et al., 2020; Yu et al., 2020). The standard curve is based on  
449 the SARS-CoV-2 E gene. Prior to PCR, cDNA was generated from each animal using  
450 Superscript III VILO (Invitrogen) according to the manufacturer's instructions. Using the  
451 sequences targeting the E gene mRNA, a TaqMan custom gene expression assay (Thermo Fisher  
452 Scientific) was designed (Wolfel et al., 2020) and reactions were carried out using a QuantStudio  
453 6 and 7 Flex Real-Time PCR system (Applied Biosystems) according to the manufacturer's  
454 instructions. Standard curves were generated to calculate sgRNA/mL or per swab. Viral load for  
455 each timepoint tested per NHP was reported as the average of two replicates. The sensitivity of  
456 this assay was 50 copies per mL of BAL or per swab.

457

#### 458 *Quantification and statistical analysis*

459 The average change in viral load ( $\log_{10}$  sgRNA copies/mL or swab) was assessed from day 1 to  
460 day 14 (Study 2), or from day 1 to day 10 (Study 3 and 4). The time-weighted average (TWA)  
461 values for the change of sgRNA viral load in BAL or NP from day 1 to day 10 after viral  
462 challenge were calculated as the area under the curve (AUC) of the change in viral load in Prism  
463 (version 9.1.2; GraphPad) and then divided by 10 as described previously (Baum et al., 2020a)  
464 (**Table S1**). The TWA values of each treatment group were compared to those of the sham group

465 using Welch's t-test. The significance level alpha of 10% was pre-specified, and estimated P-  
466 values are indicated in the figures. TWA threshold was set up to  $\leq 0.3$  for full protection,  $\leq 0.51$   
467 (the lower sham point) for partial protection, and  $> 0.51$  for no protection in BAL, and  $\leq 0.3$  for  
468 full protection,  $< 1.638$  (the lower sham point), for partial protection, and  $> 1.638$  for no  
469 protection in NP. To estimate protective antibody concentration or neutralizing titer in serum, the  
470 optimal thresholds that maximizes the sum of sensitivity and specificity for full protection were  
471 calculated and reported in **Table S2**. Sensitivity is the proportion above the threshold in the  
472 fully-protected subjects, and specificity is the proportion below the threshold in partially- or non-  
473 protected subjects. The fitting curves and confidence intervals to visualize the relationship  
474 between TWA and antibody levels were estimated using Lowess curve smoothing method using  
475 ggplot2 in R software. The other data visualization was performed using Prism software.

476 **FIGURE LEGENDS**

477

478 **Figure 1. Pharmacokinetics and biodistribution of ADM03820.**

479 (A) Schema of study design. Different doses of antibody cocktail ADM03820 (containing  
480 COV2-2130/YTE-LALA and COV2-2381/YTE-LALA at a 1:1 ratio) were administered to  
481 rhesus monkeys (n=3 per group) by IV (11.7 or 31.3 mg/kg) or IM (11.7 or 31.3 mg/kg) route.  
482 Human antibody concentration was assessed by ELISA in (B) serum, (C) BAL, or (D) nasal  
483 swab eluate samples at indicated time points after ADM03820 administration. The dotted  
484 horizontal line depicts the assay limit of detection.

485

486 **Figure 2. Pharmacokinetics, antibody neutralizing titers, and prophylactic efficacy of**  
487 **ADM03820 mAbs in SARS-CoV-2-challenged NHPs.**

488 (A) Schema of study design. Different doses of ADM03820 were administered to rhesus  
489 monkeys (day -3) by IM (3.9 or 11.7 mg/kg) or IV (31.3 mg/kg) route (n=4 per group). One  
490 group of NHPs was left untreated (sham; n=4) and served as a control. Animals in all groups  
491 were challenged with  $10^5$  TCID<sub>50</sub> SARS-CoV-2 by the intranasal and intratracheal routes on day  
492 0.

493 (B) Human antibody concentration in serum was assessed by ELISA at indicated time points  
494 after ADM03820 administration and viral challenge.

495 (C) Total neutralizing antibody titers were assessed in serum at indicated time points using  
496 pseudovirus neutralization assay. The red line indicates the median titer of neutralizing  
497 antibodies in each group.



498 **(D)** Subgenomic RNA (sgRNA) levels were assessed at various time points after viral challenge  
499 in bronchoalveolar lavage (BAL) samples using RT-qPCR.

500 **(E)** Subgenomic RNA (sgRNA) levels were assessed at various time points after viral challenge  
501 in nasopharyngeal (NP) swab samples.

502 Each black curve shows the measurements from individual animals, with red lines indicating the  
503 median values of measurements for animals within each treatment group. Neutralization assay  
504 limit of detection = 50 copies/mL or 50 copies/swab for panels (D) and (E). For statistical  
505 analysis, refer to *Methods* section.

506

507 **Figure 3. Pharmacokinetics, neutralizing titers, and prophylactic efficacy of individual**  
508 **mAbs of the cocktail in SARS-CoV-2-challenged NHPs.**

509 **(A)** Schema of study design. Individual mAbs COV2-2130/YTE-LALA or COV2-2381/YTE-  
510 LALA (n=3 NHP per group) were administered to rhesus monkeys (day -3) at different doses  
511 (1.95 mg/kg or 15.65 mg/kg) and routes (IM or IV) as indicated. One group of NHPs was left  
512 untreated (sham; n=4) to serve as controls. Animals in all groups were challenged with SARS-  
513 CoV-2 by the intranasal and intratracheal routes on day 0.

514 **(B)** Human antibody concentration was assessed by ELISA in serum at indicated time points  
515 after indicated mAb administration and viral challenge. **(C)** Total neutralizing antibody titers  
516 were assessed in serum at indicated time points using a pseudovirus neutralization assay. Each  
517 black curve shows the measurements from an individual animal, with red lines indicating the  
518 median values of measurements for animals within each treatment group.

519 **(C)** sgRNA levels were assessed after viral challenge at various time points in BAL samples  
520 using RT-qPCR.

521 (D) sgRNA levels were assessed after viral challenge at various time points in nasopharyngeal  
522 swab samples.

523 The red line depicts the median levels of sgRNA in each group. Each black curve shows an  
524 individual animal's measurements, with red lines indicating the median values of measurements  
525 for animals within each treatment group. Neutralization assay limit of detection = 50 copies/mL  
526 or 50 copies/swab. For statistical analysis, refer to *Methods* section.

527

528 **Figure 4. Pharmacokinetics, neutralizing titers, and prophylactic efficacy of ADM03820 in**  
529 **a dose de-escalation study and IM antibody administration in NHPs.**

530 (A) Schema of study design. Different doses of ADM03820 were administered to rhesus  
531 monkeys (day -6) by IM route (3.91, 1.95, 0.98, and 0.49 mg/kg; n=3 NHP per group). One  
532 group of NHPs was left untreated (sham; n=3) and served as a control. Animals in all groups  
533 were challenged with SARS-CoV-2 by the intranasal and intratracheal routes at day 0.

534 (B) Human antibody concentration was assessed by ELISA in serum at indicated time points  
535 after ADM03820 administration and viral challenge.

536 (C) Total neutralizing antibody titers in serum were assessed at indicated time points using a  
537 pseudovirus neutralization assay. The red line shows median titer of neutralizing antibodies in  
538 each group.

539 (D) sgRNA levels were assessed at various time points after viral challenge in BAL samples  
540 using RT-qPCR.

541 (E) sgRNA levels were assessed at various time points after viral challenge in nasopharyngeal  
542 swab samples.

543 The red line depicts the median levels of sgRNA in each group. Each black curve shows  
544 measurements from an individual animal, with red lines indicating the median values of  
545 measurements for animals within each treatment group. Assay limit of detection = 50 copies/mL  
546 or 50 copies/swab. For statistical analysis, refer to *Methods* section.

547

548 **Figure 5. Human antibody concentration and antibody neutralizing titer in NHP serum**  
549 **associated with protection against viral challenge in BAL or NP samples.** (A-D) The time-  
550 weighted average (TWA) values for the change of sgRNA viral load in BAL or NP swabs from  
551 day 1 to day 10 after viral challenge were compared to antibody concentration in serum or serum  
552 NT<sub>50</sub> value for each animal from studies 2, 3 and 4 described in Figures 2 through 7. The fitting  
553 curves were estimated using Lowess curve smoothing method and are shown in black, and grey  
554 shading indicates the confidence interval. Shapes indicate individual animals, colors indicate  
555 route of antibody treatment, and animals from separate studies are shown with different shapes  
556 as detailed in the figure. Horizontal black dotted lines indicate designated TWA thresholds for  
557 full (bottom line) and partial (top line) protection. Vertical dotted orange dashed line in the  
558 graphs indicates designated estimated optimal cut-off for protective antibody concentration or  
559 titer in NHP serum. For calculation of TWA and cut-off values, refer to *Methods* section. (E)  
560 Percent animals that fully protected, partially protected, or non-protected determined using the  
561 estimated thresholds for protection as in panels A-D. Gradient of green shading visualize % of  
562 protected animals in which dark green indicates higher % of protected animals and light green  
563 indicates lower % of protected animals for each described condition.

564 **References**

565

566 Anderson, E.J., Roupheal, N.G., Widge, A.T., Jackson, L.A., Roberts, P.C., Makhene, M.,  
567 Chappell, J.D., Denison, M.R., Stevens, L.J., Pruijssers, A.J., *et al.* (2020). Safety and  
568 immunogenicity of SARS-CoV-2 mRNA-1273 vaccine in older adults. *New Engl. J. Med.* 383,  
569 2427-2438.

570

571 AstraZeneca (2021). AZD7442 PROVENT Phase III prophylaxis trial met primary endpoint in  
572 preventing COVID-19 (press release). [https://www.astrazenecacom/media-centre/press-](https://www.astrazenecacom/media-centre/press-releases/2021/azd7442-prophylaxis-trial-met-primary-endpoint.html)  
573 [releases/2021/azd7442-prophylaxis-trial-met-primary-endpoint.html](https://www.astrazenecacom/media-centre/press-releases/2021/azd7442-prophylaxis-trial-met-primary-endpoint.html) (accessed 15 October 2021).

574

575 Baum, A., Ajithdoss, D., Copin, R., Zhou, A., Lanza, K., Negron, N., Ni, M., Wei, Y.,  
576 Mohammadi, K., Musser, B., *et al.* (2020a). REGN-COV2 antibodies prevent and treat SARS-  
577 CoV-2 infection in rhesus macaques and hamsters. *Science* 370, 1110-1115.

578

579 Baum, A., Fulton, B.O., Wloga, E., Copin, R., Pascal, K.E., Russo, V., Giordano, S., Lanza, K.,  
580 Negron, N., Ni, M., *et al.* (2020b). Antibody cocktail to SARS-CoV-2 spike protein prevents  
581 rapid mutational escape seen with individual antibodies. *Science* 369, 1014-1018.

582

583 Begin, P., Callum, J., Jamula, E., Cook, R., Heddle, N.M., Tinmouth, A., Zeller, M.P., Beaudoin-  
584 Bussieres, G., Amorim, L., Bazin, R., *et al.* (2021). Convalescent plasma for hospitalized  
585 patients with COVID-19: an open-label, randomized controlled trial. *Nat. Med.* doi:  
586 10.1038/s41591-021-01488-2. Sep 9. Online ahead of print.

587

588 Bradfute, S.B., Hurwitz, I., Yingling, A.V., Ye, C., Cheng, Q., Noonan, T.P., Raval, J.S., Sosa,  
589 N.R., Mertz, G.J., Perkins, D.J., *et al.* (2020). Severe acute respiratory syndrome coronavirus 2  
590 neutralizing antibody titers in convalescent plasma and recipients in New Mexico: an open  
591 treatment study in patients with coronavirus disease 2019. *J. Infect. Dis.* 222, 1620-1628.

592

593 Brouwer, P.J.M., Caniels, T.G., van der Straten, K., Snitselaar, J.L., Aldon, Y., Bangaru, S.,  
594 Torres, J.L., Okba, N.M.A., Claireaux, M., Kerster, G., *et al.* (2020). Potent neutralizing  
595 antibodies from COVID-19 patients define multiple targets of vulnerability. *Science* 369, 643-  
596 650.

597

598 Cai, Y., Zhang, J., Xiao, T., Peng, H., Sterling, S.M., Walsh, R.M., Jr., Rawson, S., Rits-Volloch,  
599 S., and Chen, B. (2020). Distinct conformational states of SARS-CoV-2 spike protein. *Science*  
600 369, 1586-1592.

601

602 Cao, Y., Su, B., Guo, X., Sun, W., Deng, Y., Bao, L., Zhu, Q., Zhang, X., Zheng, Y., Geng, C.,  
603 *et al.* (2020). Potent neutralizing antibodies against SARS-CoV-2 identified by high-throughput  
604 single-cell sequencing of convalescent patients' B cells. *Cell* 182, 73-84 e16.

605

606 Chan, J.F., Yuan, S., Kok, K.H., To, K.K., Chu, H., Yang, J., Xing, F., Liu, J., Yip, C.C., Poon,  
607 R.W., *et al.* (2020). A familial cluster of pneumonia associated with the 2019 novel coronavirus  
608 indicating person-to-person transmission: a study of a family cluster. *Lancet* 395, 514-523.

609

610 Chandrashekar, A., Liu, J., Martinot, A.J., McMahan, K., Mercado, N.B., Peter, L., Tostanoski,  
611 L.H., Yu, J., Maliga, Z., Nekorchuk, M., *et al.* (2020). SARS-CoV-2 infection protects against  
612 rechallenge in rhesus macaques. *Science* 369, 812-817.

613

614 Chen, N., Zhou, M., Dong, X., Qu, J., Gong, F., Han, Y., Qiu, Y., Wang, J., Liu, Y., Wei, Y., *et*  
615 *al.* (2020a). Epidemiological and clinical characteristics of 99 cases of 2019 novel coronavirus  
616 pneumonia in Wuhan, China: a descriptive study. *Lancet* 395, 507-513.

617

618 Chen, W.H., Strych, U., Hotez, P.J., and Bottazzi, M.E. (2020b). The SARS-CoV-2 Vaccine  
619 Pipeline: an Overview. *Curr. Trop. Med. Rep.*, 1-4.

620

621 Chen, R.E., Zhang, X., Case, J.B., Winkler, E.S., Liu, Y, VanBlargan, L.A., Liu, J, Errico, J.M.,  
622 Xie, X., Suryadevara, N., *et al.* Resistance of SARS-CoV-2 variants to neutralization by  
623 monoclonal and serum-derived polyclonal antibodies (2021a). *Nat. Med.* 4, 717-726.

624

625 Chen, R.E., Winkler, E.S., Case, J.B., Aziati, I.D., Bricker, T.L., Joshi, A., Darling, T.L., Ying,  
626 B., Errico, J.M., Shrihari, S., *et al.* In vivo monoclonal antibody efficacy against SARS-CoV-2  
627 variant strains (2021b). *Nature* 596, 103-108.

628

629 Corbett, K.S., Flynn, B., Foulds, K.E., Francica, J.R., Boyoglu-Barnum, S., Werner, A.P., Flach,  
630 B., O'Connell, S., Bock, K.W., Minai, M., *et al.* (2020). Evaluation of the mRNA-1273 Vaccine  
631 against SARS-CoV-2 in Nonhuman Primates. *New Engl. J. Med.* 383, 1544-1555.

632

633 Dall'Acqua, W.F., Kiener, P.A., and Wu, H. (2006). Properties of human IgG1s engineered for  
634 enhanced binding to the neonatal Fc receptor (FcRn). *J. Biol. Chem.* *281*, 23514-23524.  
635

636 Dall'Acqua, W.F., Woods, R.M., Ward, E.S., Palaszynski, S.R., Patel, N.K., Brewah, Y.A., Wu,  
637 H., Kiener, P.A., and Langermann, S. (2002). Increasing the affinity of a human IgG1 for the  
638 neonatal Fc receptor: biological consequences. *J. Immunol.* *169*, 5171-5180.  
639

640 Demogines, A., Farzan, M., and Sawyer, S.L. (2012). Evidence for ACE2-utilizing  
641 coronaviruses (CoVs) related to severe acute respiratory syndrome CoV in bats. *J. Virol.* *86*,  
642 6350-6353.  
643

644 Fan, X., Cao, D., Kong, L., and Zhang, X. (2020). Cryo-EM analysis of the post-fusion structure  
645 of the SARS-CoV spike glycoprotein. *Nat. Commun.* *11*, 3618.  
646

647 FDA (2020). Coronavirus (COVID-19) Update: FDA authorizes monoclonal antibodies for  
648 treatment of COVID-19. [https://www.fda.gov/news-events/press-announcements/coronavirus-](https://www.fda.gov/news-events/press-announcements/coronavirus-covid-19-update-fda-authorizes-monoclonal-antibodies-treatment-covid-19)  
649 [covid-19-update-fda-authorizes-monoclonal-antibodies-treatment-covid-19](https://www.fda.gov/news-events/press-announcements/coronavirus-covid-19-update-fda-authorizes-monoclonal-antibodies-treatment-covid-19) (accessed 15 October  
650 2021).  
651

652 FDA (2021a). Coronavirus (COVID-19) Update: FDA authorizes additional monoclonal  
653 antibody for treatment of COVID-19. [https://www.fda.gov/news-events/press-](https://www.fda.gov/news-events/press-announcements/coronavirus-covid-19-update-fda-authorizes-additional-monoclonal-antibody-treatment-covid-19)  
654 [announcements/coronavirus-covid-19-update-fda-authorizes-additional-monoclonal-antibody-](https://www.fda.gov/news-events/press-announcements/coronavirus-covid-19-update-fda-authorizes-additional-monoclonal-antibody-treatment-covid-19)  
655 [treatment-covid-19](https://www.fda.gov/news-events/press-announcements/coronavirus-covid-19-update-fda-authorizes-additional-monoclonal-antibody-treatment-covid-19) (accessed 15 October 2021).

656

657 FDA (2021b). FDA authorizes REGEN-COV monoclonal antibody therapy for post-exposure  
658 prophylaxis (prevention) for COVID-19. [https://www.fda.gov/drugs/drug-safety-and-  
659 availability/fda-authorizes-regen-cov-monoclonal-antibody-therapy-post-exposure-prophylaxis-  
660 prevention-covid-19](https://www.fda.gov/drugs/drug-safety-and-availability/fda-authorizes-regen-cov-monoclonal-antibody-therapy-post-exposure-prophylaxis-prevention-covid-19) (accessed 15 October 2021).

661

662 Frank, H.K., Enard, D., and Boyd, S.D. (2020). Exceptional diversity and selection pressure on  
663 SARS-CoV and SARS-CoV-2 host receptor in bats compared to other mammals. bioRxiv (pre-  
664 print). doi: 10.1101/2020.04.20.051656

665

666 Greaney, A.J., Starr, T.N., Gilchuk, P., Zost, S.J., Binshtein, E., Loes, A.N., Hilton, S.K.,  
667 Huddleston, J., Eguia, R., Crawford, K.H.D., *et al.* (2021). Complete mapping of mutations to  
668 the SARS-CoV-2 spike receptor-binding domain that escape antibody recognition. *Cell Host  
669 Microbe* 29, 44-57 e49.

670

671 Jackson, L.A., Anderson, E.J., Roupael, N.G., Roberts, P.C., Makhene, M., Coler, R.N.,  
672 McCullough, M.P., Chappell, J.D., Denison, M.R., Stevens, L.J., *et al.* (2020). An mRNA  
673 vaccine against SARS-CoV-2 - preliminary report. *New Engl. J. Med.* 383, 1920-1931.

674

675 Janiaud, P., Axfors, C., Schmitt, A.M., Gloy, V., Ebrahimi, F., Hepprich, M., Smith, E.R., Haber,  
676 N.A., Khanna, N., Moher, D., *et al.* (2021). Association of convalescent plasma treatment with  
677 clinical outcomes in patients with COVID-19: A systematic review and meta-analysis. *JAMA*  
678 325, 1185-1195.



679

680 Jones, B.E., Brown-Augsburger, P.L., Corbett, K.S., Westendorf, K., Davies, J., Cujec, T.P.,  
681 Wiethoff, C.M., Blackbourne, J.L., Heinz, B.A., Foster, D., *et al.* (2021). The neutralizing  
682 antibody, LY-CoV555, protects against SARS-CoV-2 infection in nonhuman primates. *Sci.*  
683 *Transl. Med.* *13*, eabf1906.

684

685 Ju, B., Zhang, Q., Ge, J., Wang, R., Sun, J., Ge, X., Yu, J., Shan, S., Zhou, B., Song, S., *et al.*  
686 (2020). Human neutralizing antibodies elicited by SARS-CoV-2 infection. *Nature* *584*, 115-119.

687

688 Khoury, D.S., Cromer, D., Reynaldi, A., Schlub, T.E., Wheatley, A.K., Juno, J.A., Subbarao, K.,  
689 Kent, S.J., Triccas, J.A., and Davenport, M.P. (2021). Neutralizing antibody levels are highly  
690 predictive of immune protection from symptomatic SARS-CoV-2 infection. *Nat. Med.* *27*, 1205-  
691 1211.

692

693 Letko, M., Marzi, A., and Munster, V. (2020). Functional assessment of cell entry and receptor  
694 usage for SARS-CoV-2 and other lineage B betacoronaviruses. *Nat. Microbiol.* *5*, 562-569.

695

696 Li, Q., Guan, X., Wu, P., Wang, X., Zhou, L., Tong, Y., Ren, R., Leung, K.S.M., Lau, E.H.Y.,  
697 Wong, J.Y., *et al.* (2020). Early transmission dynamics in Wuhan, China, of Novel Coronavirus-  
698 infected pneumonia. *New Engl. J. Med.* *382*, 1199-1207.

699

700 Loo, Y.M., McTamney, P.M., Arends, R.H., Gasser, R.A.J., Abram, M.E., Aksyuk, A., Diallo,  
701 S., Flores, D.J., Kelly, E.J., Ren, K., *et al.* (2021). AZD7442 demonstrates prophylactic and

702 therapeutic efficacy in non-human primates and extended half-life in humans. medRxiv (pre-  
703 print). doi: 10.1101/2021.08.30.21262666.

704

705 Lund, J., Winter, G., Jones, P.T., Pound, J.D., Tanaka, T., Walker, M.R., Artymiuik, P.J., Arata,  
706 Y., Burton, D.R., Jefferis, R., *et al.* (1991). Human Fc gamma RI and Fc gamma RII interact  
707 with distinct but overlapping sites on human IgG. *J. Immunol.* 147, 2657-2662.

708

709 MacLean, O.A., Orton, R.J., Singer, J.B., Robertson, D.L. (2020). No evidence for distinct types  
710 in the evolution of SARS-CoV-2. *Virus Evol.* 6, veaa034: doi: 10.1093/ve/veaa034.

711

712 McMahan, K., Yu, J.U., Mercado, N.B., Loos, C., Tostanoski, L.H., Chandrashekar, A., Liu,  
713 J.Y., Peter, L., Atyeo, C., Zhu, A., *et al.* (2021). Correlates of protection against SARS-CoV-2 in  
714 rhesus macaques. *Nature* 590, 630–634.

715

716 Mulligan, M.J., Lyke, K.E., Kitchin, N., Absalon, J., Gurtman, A., Lockhart, S., Neuzil, K.,  
717 Raabe, V., Bailey, R., Swanson, K.A., *et al.* (2020). Phase I/II study of COVID-19 RNA vaccine  
718 BNT162b1 in adults. *Nature* 586, 589-593.

719

720 Pinto, D., Park, Y.J., Beltramello, M., Walls, A.C., Tortorici, M.A., Bianchi, S., Jaconi, S.,  
721 Culap, K., Zatta, F., De Marco, A., *et al.* (2020). Cross-neutralization of SARS-CoV-2 by a  
722 human monoclonal SARS-CoV antibody. *Nature* 583, 290-295.

723

724 Ravichandran, S., Coyle, E.M., Klenow, L., Tang, J., Grubbs, G., Liu, S., Wang, T., Golding, H.,  
725 and Khurana, S. (2020). Antibody signature induced by SARS-CoV-2 spike protein immunogens  
726 in rabbits. *Sci. Transl. Med.* *12*, eabc3539.

727

728 Richards, J., Auger, J., Peace, D., Gale, D., Michel, J., Koons, A., Haverty, T., Zivin, R., Jolliffe,  
729 L., and Bluestone, J.A. (1999). Phase I evaluation of humanized OKT3: toxicity and  
730 immunomodulatory effects of hOKT3gamma4. *Cancer Res* *59*, 2096-2101.

731

732 Robbiani, D.F., Gaebler, C., Muecksch, F., Lorenzi, J.C.C., Wang, Z., Cho, A., Agudelo, M.,  
733 Barnes, C.O., Gazumyan, A., Finkin, S., *et al.* (2020). Convergent antibody responses to SARS-  
734 CoV-2 in convalescent individuals. *Nature* *584*, 437-442.

735

736 Rogers, T.F., Zhao, F., Huang, D., Beutler, N., Burns, A., He, W.T., Limbo, O., Smith, C., Song,  
737 G., Woehl, J., *et al.* (2020). Isolation of potent SARS-CoV-2 neutralizing antibodies and  
738 protection from disease in a small animal model. *Science* *369*, 956-963.

739

740 Shi, R., Shan, C., Duan, X., Chen, Z., Liu, P., Song, J., Song, T., Bi, X., Han, C., Wu, L., *et al.*  
741 (2020). A human neutralizing antibody targets the receptor-binding site of SARS-CoV-2. *Nature*  
742 *584*, 120-124.

743

744 Starr, T.N., Greaney, A.J., Hilton, S.K., Ellis, D., Crawford, K.H.D., Dingens, A.S., Navarro,  
745 M.J., Bowen, J.E., Tortorici, M.A., Walls, A.C., *et al.* (2020). Deep mutational scanning of

746 SARS-CoV-2 receptor binding domain reveals constraints on folding and ACE2 binding. *Cell*  
747 *182*, 1295-1310 e1220.

748

749 Tomic, M.T., Espinoza, Y., Martinez, Z., Pham, K., Cobb, R.R., Snow, D.M., Earnhart, C.G.,  
750 Pals, T., Syar, E.S., Niemuth, N., *et al.* (2019). Monoclonal antibody combinations prevent  
751 serotype A and serotype B inhalational botulism in a Guinea pig model. *Toxins 11*, 208.

752

753 Uppal, H., Doudement, E., Mahapatra, K., Darbonne, W.C., Bumbaca, D., Shen, B.Q., Du, X.,  
754 Saad, O., Bowles, K., Olsen, S., *et al.* (2015). Potential mechanisms for thrombocytopenia  
755 development with trastuzumab emtansine (T-DM1). *Clin. Cancer Res. 21*, 123-133.

756

757 VanBlargan, L.A., Adams, L.J., Liu, Z., Chen, R.E., Gilchuk, P., Raju, S., Smith, B.K., Zhao, H.,  
758 Case, J.B., Winkler, E.S., *et al* (2021). A potently neutralizing SARS-CoV-2 antibody inhibits  
759 variants of concern by utilizing unique binding residues in a highly conserved epitope. *Immunity*  
760 *54*. doi: 10.1016/j.immuni.2021.08.016. PMC8373659.

761

762 Walls, A.C., Park, Y.J., Tortorici, M.A., Wall, A., McGuire, A.T., and Veerler, D. (2020).  
763 Structure, function, and antigenicity of the SARS-CoV-2 spike glycoprotein. *Cell 181*, 281-292  
764 e286.

765

766 Wan, Y., Shang, J., Graham, R., Baric, R.S., and Li, F. (2020). Receptor recognition by the  
767 Novel Coronavirus from Wuhan: an analysis based on decade-long structural studies of SARS  
768 coronavirus. *J. Virol. 94*, e00127-20.

769

770 Wang, C., Horby, P.W., Hayden, F.G., and Gao, G.F. (2020). A novel coronavirus outbreak of  
771 global health concern. *Lancet* 395, 470-473.

772

773 Wang, R., Xiao, H., Guo, R., Li, Y., and Shen, B. (2015). The role of C5a in acute lung injury  
774 induced by highly pathogenic viral infections. *Emerg. Microbes Infect.* 4, e28.

775

776 Wec, A.Z., Wrapp, D., Herbert, A.S., Maurer, D.P., Haslwanter, D., Sakharkar, M., Jangra, R.K.,  
777 Dieterle, M.E., Lilov, A., Huang, D., *et al.* (2020). Broad neutralization of SARS-related viruses  
778 by human monoclonal antibodies. *Science* 369, 731-736.

779

780 Weinreich, D.M., Sivapalasingam, S., Norton, T., Ali, S., Gao, H., Bhore, R., Musser, B.J., Soo,  
781 Y., Rofail, D., Im, J., *et al.* (2020). REGN-COV2, a neutralizing antibody cocktail, in outpatients  
782 with Covid-19. *New Engl. J. Med.* 384, 238-251.

783

784 Wines, B.D., Powell, M.S., Parren, P.W., Barnes, N., and Hogarth, P.M. (2000). The IgG Fc  
785 contains distinct Fc receptor (FcR) binding sites: the leukocyte receptors Fc gamma RI and Fc  
786 gamma RIIa bind to a region in the Fc distinct from that recognized by neonatal FcR and protein  
787 A. *J. Immunol.* 164, 5313-5318.

788

789 Winkler, E.S., Gilchuk, P., Yu, J., Bailey, A.L., Chen, R.E., Chong, Z., Zost, S.J., Jang, H.,  
790 Huang, Y., Allen, J.D., *et al.* (2021). Human neutralizing antibodies against SARS-CoV-2

791 require intact Fc effector functions for optimal therapeutic protection. *Cell* *184*, 1804-1820  
792 e1816.

793

794 Wolfel, R., Corman, V.M., Guggemos, W., Seilmaier, M., Zange, S., Muller, M.A., Niemeyer,  
795 D., Jones, T.C., Vollmar, P., Rothe, C., *et al.* (2020). Virological assessment of hospitalized  
796 patients with COVID-2019. *Nature* *581*, 465-469.

797

798 Woodle, E.S., Bluestone, J.A., Zivin, R.A., Jolliffe, L.K., Auger, J., Xu, D., and Thistlethwaite,  
799 J.R. (1998). Humanized, nonmitogenic OKT3 antibody, huOKT3 gamma(Ala-Ala): initial  
800 clinical experience. *Transplant Proc* *30*, 1369-1370.

801

802 Wrapp, D., Wang, N., Corbett, K.S., Goldsmith, J.A., Hsieh, C.L., Abiona, O., Graham, B.S.,  
803 and McLellan, J.S. (2020). Cryo-EM structure of the 2019-nCoV spike in the prefusion  
804 conformation. *Science* *367*, 1260-1263.

805

806 Wu, F., Zhao, S., Yu, B., Chen, Y.M., Wang, W., Song, Z.G., Hu, Y., Tao, Z.W., Tian, J.H., Pei,  
807 Y.Y., *et al.* (2020a). A new coronavirus associated with human respiratory disease in China.  
808 *Nature* *579*, 265-269.

809

810 Wu, Y., Wang, F., Shen, C., Peng, W., Li, D., Zhao, C., Li, Z., Li, S., Bi, Y., Yang, Y., *et al.*  
811 (2020b). A noncompeting pair of human neutralizing antibodies block COVID-19 virus binding  
812 to its receptor ACE2. *Science* *368*, 1274-1278.

813

814 Xu, D., Alegre, M.L., Varga, S.S., Rothermel, A.L., Collins, A.M., Pulito, V.L., Hanna, L.S.,  
815 Dolan, K.P., Parren, P.W., Bluestone, J.A., *et al.* (2000). In vitro characterization of five  
816 humanized OKT3 effector function variant antibodies. *Cell Immunol.* *200*, 16-26.  
817  
818 Yang, J., Wang, W., Chen, Z., Lu, S., Yang, F., Bi, Z., Bao, L., Mo, F., Li, X., Huang, Y., *et al.*  
819 (2020). A vaccine targeting the RBD of the S protein of SARS-CoV-2 induces protective  
820 immunity. *Nature* *586*, 572-577.  
821  
822 Yu, J., Tostanoski, L.H., Peter, L., Mercado, N.B., McMahan, K., Mahrokhian, S.H., Nkolola,  
823 J.P., Liu, J., Li, Z., Chandrashekar, A., *et al.* (2020). DNA vaccine protection against SARS-  
824 CoV-2 in rhesus macaques. *Science* *369*, 806-811.  
825  
826 Yu, X.Q., Robbie, G.J., Wu, Y., Esser, M.T., Jensen, K., Schwartz, H.I., Bellamy, T.,  
827 Hernandez-Illas, M., and Jafri, H.S. (2017). Safety, tolerability, and pharmacokinetics of  
828 MEDI4893, an investigational, extended-half-life, anti-Staphylococcus aureus alpha-toxin  
829 human monoclonal antibody, in healthy adults. *Antimicrob. Agents Chemother.* *61*, e01020-16.  
830  
831 Zang, J., Gu, C., Zhou, B., Zhang, C., Yang, Y., Xu, S., Bai, L., Zhang, R., Deng, Q., Yuan, Z.,  
832 *et al.* (2020). Immunization with the receptor-binding domain of SARS-CoV-2 elicits antibodies  
833 cross-neutralizing SARS-CoV-2 and SARS-CoV without antibody-dependent enhancement. *Cell*  
834 *Discov.* *6*, 61.  
835

836 Zhou, P., Yang, X.L., Wang, X.G., Hu, B., Zhang, L., Zhang, W., Si, H.R., Zhu, Y., Li, B.,  
837 Huang, C.L., *et al.* (2020). A pneumonia outbreak associated with a new coronavirus of probable  
838 bat origin. *Nature* 579, 270-273.

839

840 Zost, S.J., Gilchuk, P., Case, J.B., Binshtein, E., Chen, R.E., Nkolola, J.P., Schafer, A., Reidy,  
841 J.X., Trivette, A., Nargi, R.S., *et al.* (2020a). Potently neutralizing and protective human  
842 antibodies against SARS-CoV-2. *Nature* 584, 443-449.

843

844 Zost, S.J., Gilchuk, P., Chen, R.E., Case, J.B., Reidy, J.X., Trivette, A., Nargi, R.S., Sutton, R.E.,  
845 Suryadevara, N., Chen, E.C., *et al.* (2020b). Rapid isolation and profiling of a diverse panel of  
846 human monoclonal antibodies targeting the SARS-CoV-2 spike protein. *Nat. Med.* 26, 1422-  
847 1427.

848



849

| <b>Table 1. Neutralization breadth of ADM03820 against SARS-CoV-2 variants of concern<sup>1</sup></b> |              |                        |                              |                          |                              |
|-------------------------------------------------------------------------------------------------------|--------------|------------------------|------------------------------|--------------------------|------------------------------|
| [IC <sub>50</sub> (ng/mL) against indicated virus] <sup>2</sup>                                       |              |                        |                              |                          |                              |
| <b>WA1/2020</b>                                                                                       | <b>D614G</b> | <b>B.1.1.7 (Alpha)</b> | <b>Wash-B.1.1.351 (Beta)</b> | <b>B.1.617.2 (Delta)</b> | <b>Wash-B.1.1.28 (Gamma)</b> |
| 28                                                                                                    | 21           | 20                     | 19                           | 25                       | 8                            |

850

851 <sup>1</sup>Neutralizing activity of ADM03820 against authentic SARS-CoV-2 WA1/2020, authentic SARS-CoV-2  
852 WA1/2020 bearing D614G mutation, or authentic B1.1.7, authentic B.1.617.2, chimeric Wash-B1.351,  
853 and chimeric Wash-B.1.1.28 viruses was assessed using a focus reduction neutralization test (FRNT).

854

855 <sup>2</sup>Half-maximal inhibitory concentration (IC<sub>50</sub>) values are shown and represent the average of technical  
856 duplicates and two independent experiments.

857

## Figure 1

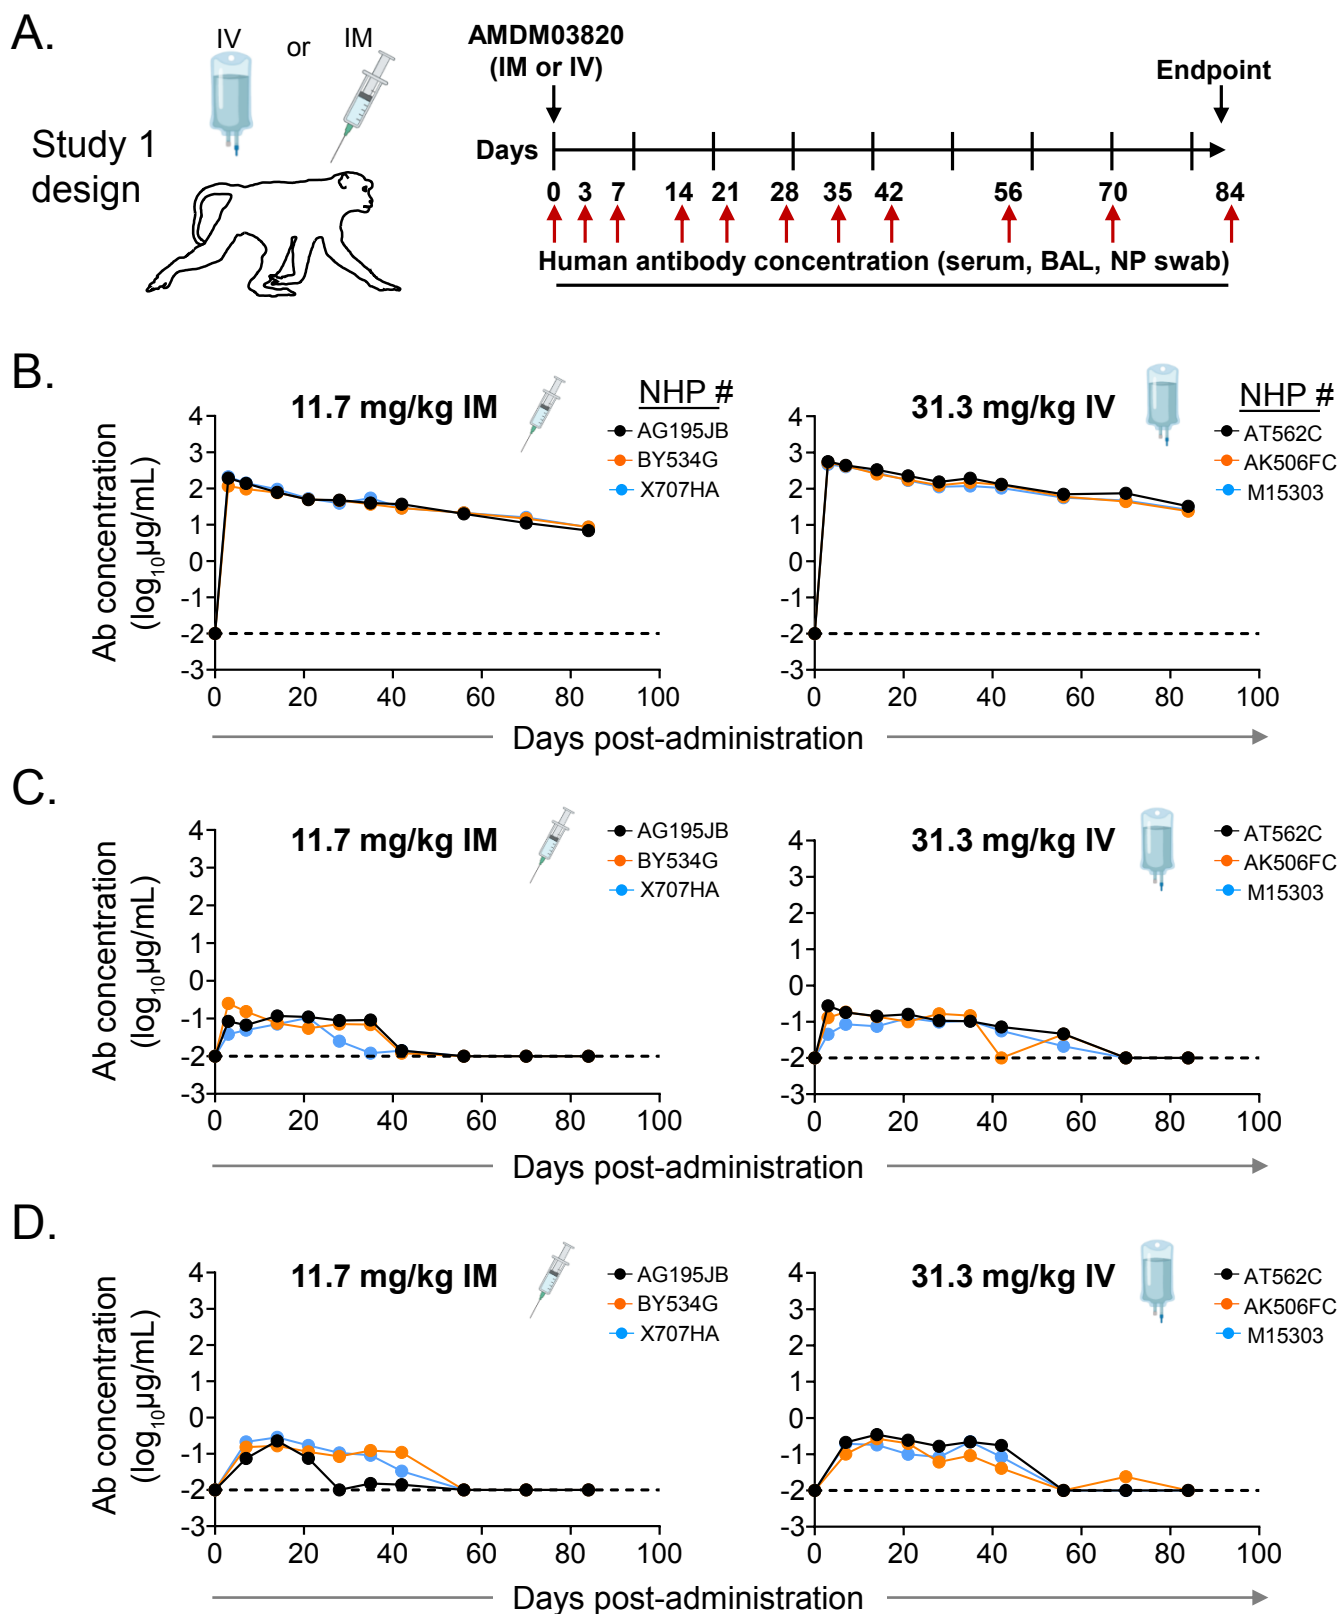

## Figure 2

A.

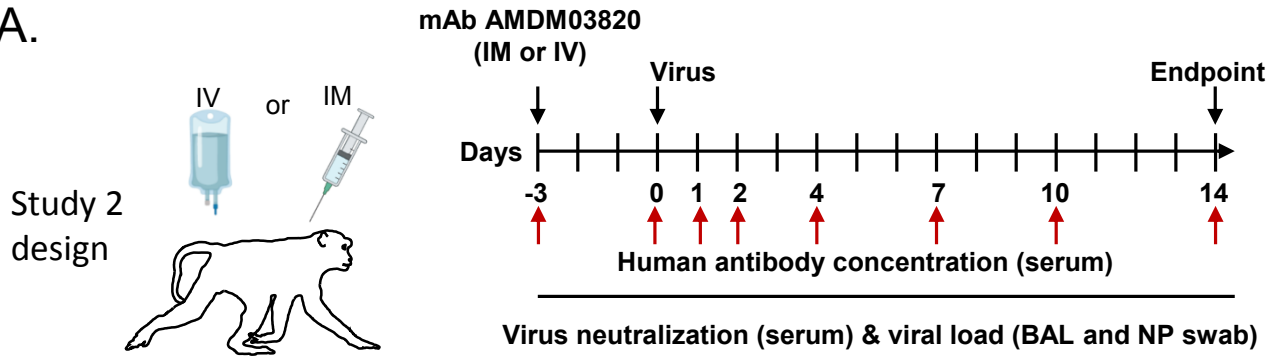

B.

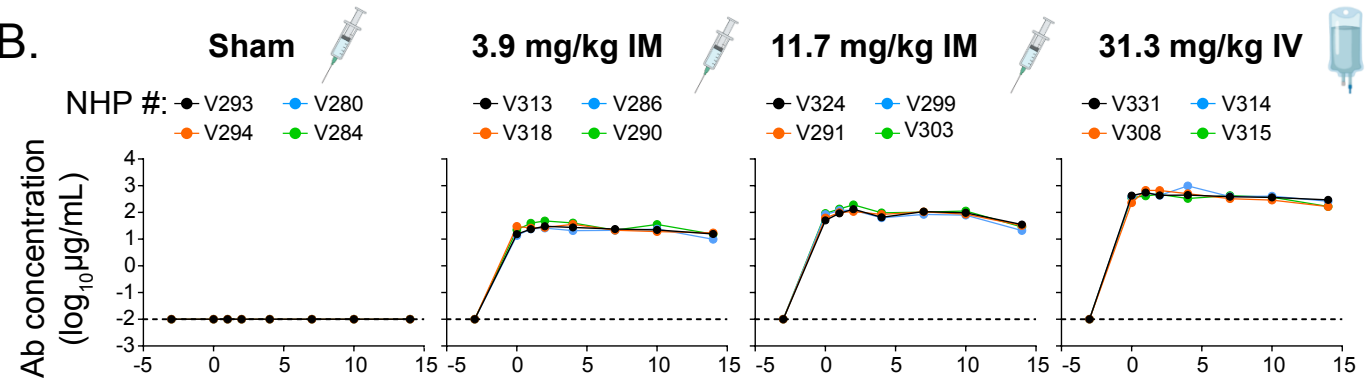

C.

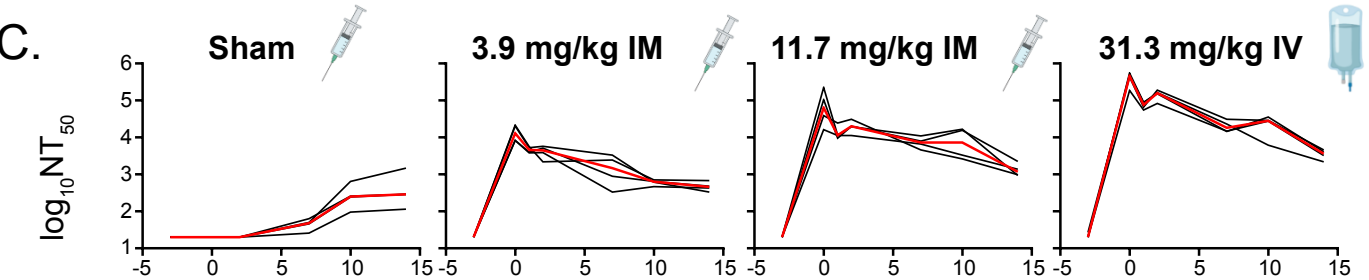

D.

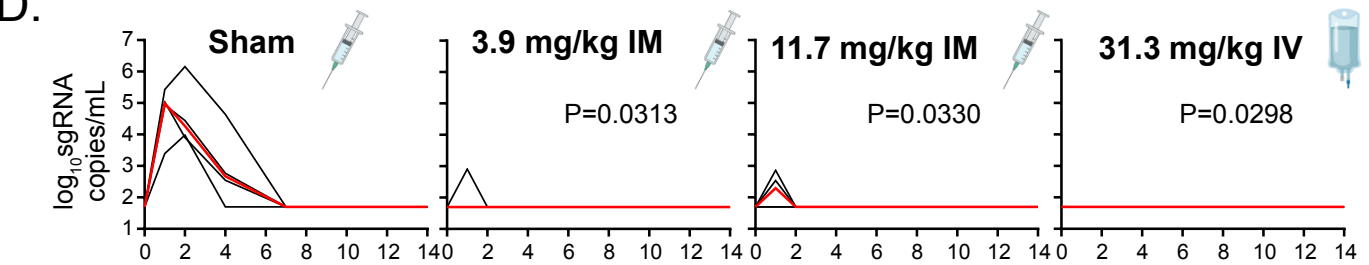

E.

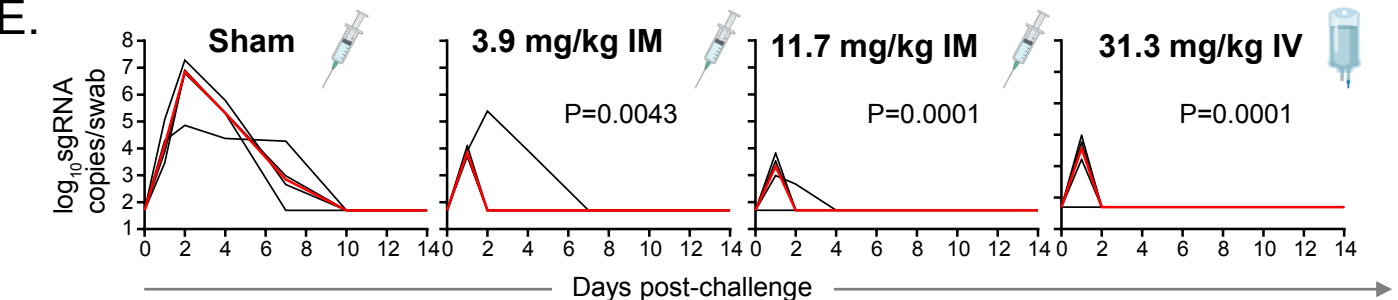

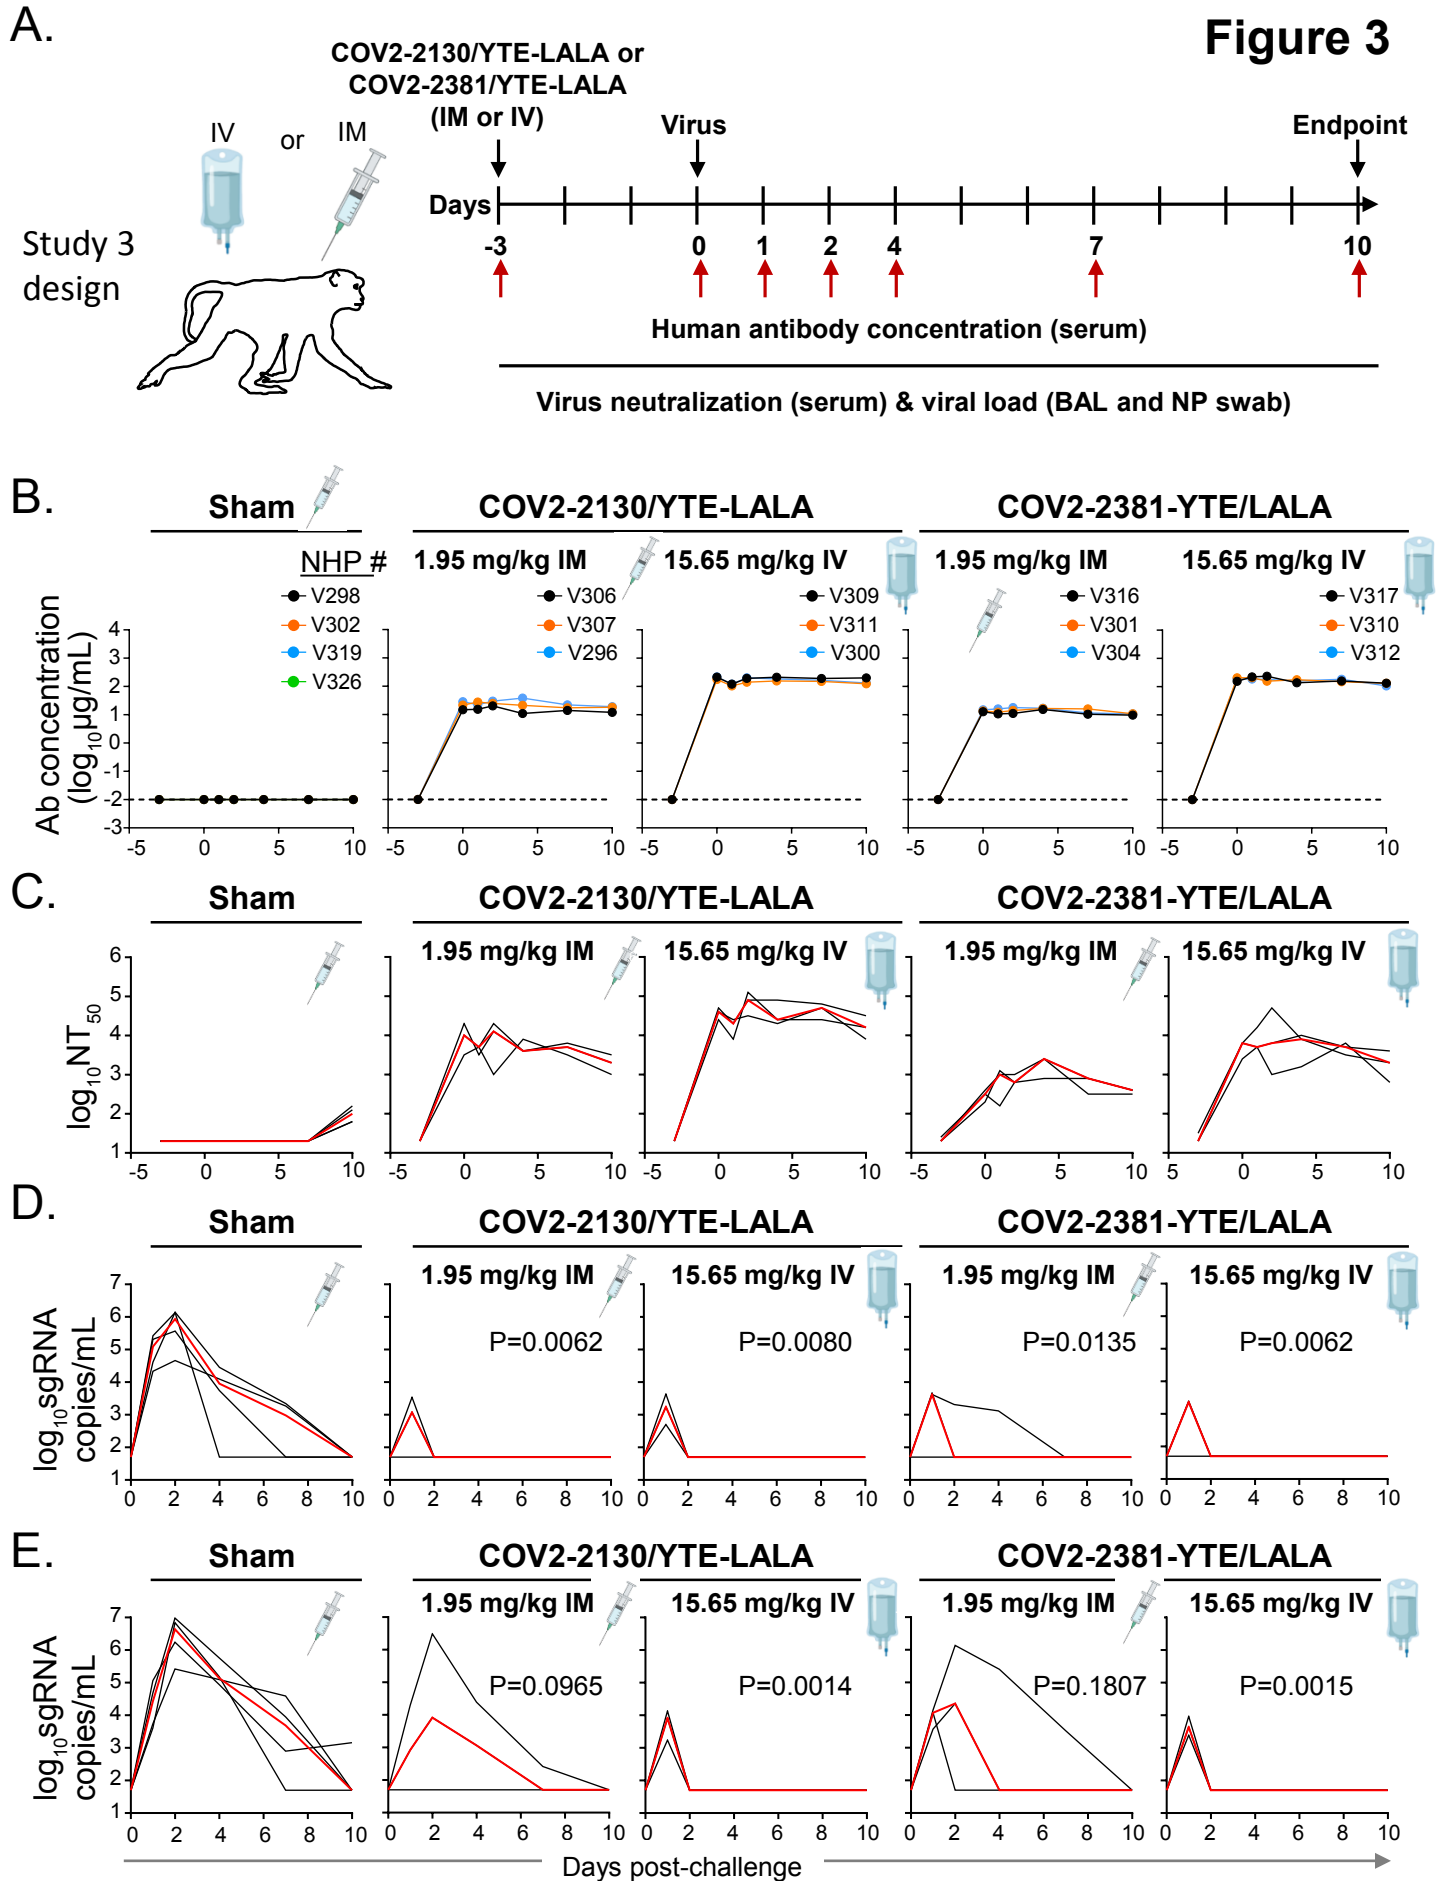

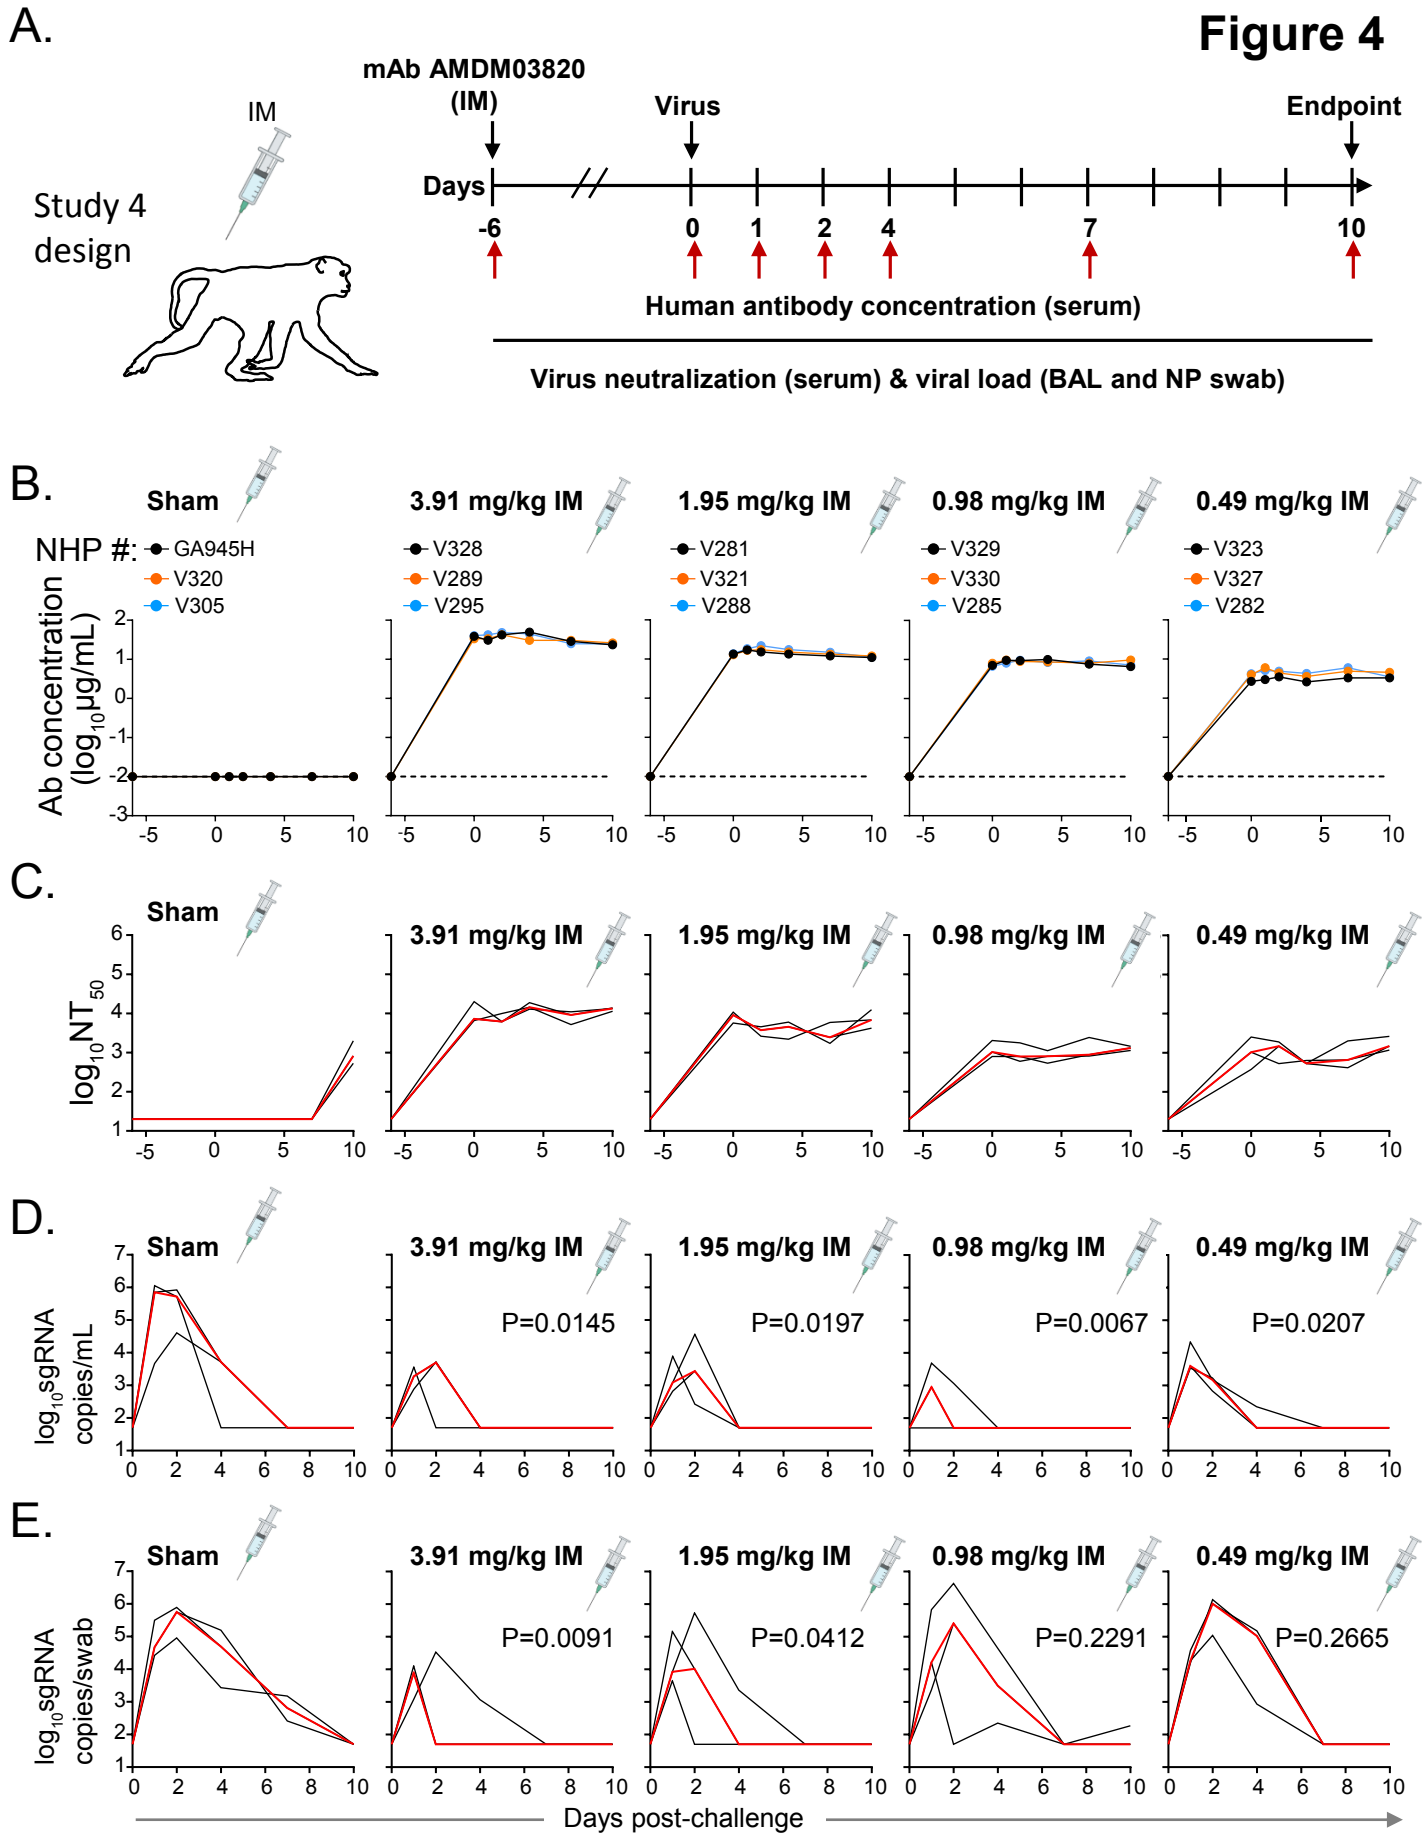

## Figure 5

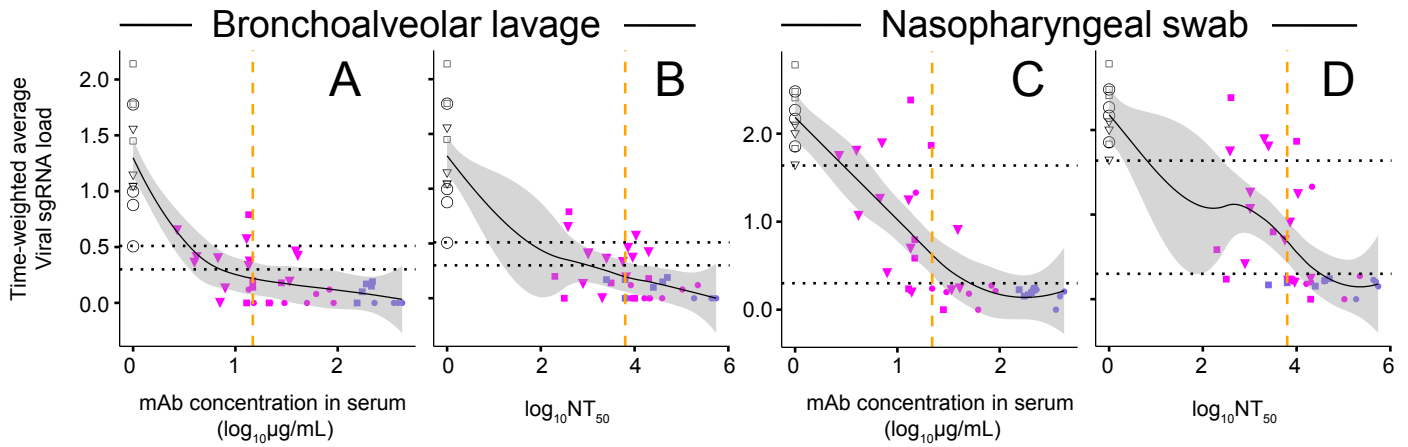

| Study | Treatment   | Threshold                                                                                        |
|-------|-------------|--------------------------------------------------------------------------------------------------|
| ○ 2   | Blue – IV   | ..... (Bottom) –TWA threshold for full protection                                                |
| □ 3   | Purple – IM | ..... (Top) –TWA threshold for partial protection                                                |
| ▽ 4   | Open – sham | ..... (Vertical dashed orange line) – Cut-off for protective mAb concentration or titer in serum |

## E

| Site                                                                    | # of NHP with indicated protection level of total animals in the cohort (%) |               |               |                |               |               |                |               |               |                |               |               |
|-------------------------------------------------------------------------|-----------------------------------------------------------------------------|---------------|---------------|----------------|---------------|---------------|----------------|---------------|---------------|----------------|---------------|---------------|
|                                                                         | BAL                                                                         |               |               |                |               |               | NP swab        |               |               |                |               |               |
|                                                                         | A                                                                           |               |               | B              |               |               | C              |               |               | D              |               |               |
| <b>Protection level</b>                                                 |                                                                             |               |               |                |               |               |                |               |               |                |               |               |
| <b>≥identified cut-off for protective mAb concentration or titer</b>    | 22/24<br>(92%)                                                              | 2/24<br>(8%)  | 0/24<br>(0%)  | 20/24<br>(83%) | 3/24<br>(13%) | 1/24<br>(4%)  | 19/20<br>(95%) | 1/20<br>(5%)  | 0/20<br>(0%)  | 20/24<br>(83%) | 3/24<br>(13%) | 1/24<br>(4%)  |
| <b>&lt;identified cut-off for protective mAb concentration or titer</b> | 4/12<br>(33%)                                                               | 5/12<br>(42%) | 3/12<br>(25%) | 6/12<br>(50%)  | 4/12<br>(33%) | 2/12<br>(17%) | 3/16<br>(19%)  | 8/16<br>(50%) | 5/16<br>(31%) | 2/12<br>(17%)  | 6/12<br>(50%) | 4/12<br>(33%) |

|      |         |      |
|------|---------|------|
| Full | Partial | None |
|------|---------|------|
